# Supplementary material
Source: PubMed Central journal article supplement (PMC3076007)
Supplement: NIHMS256405-supplement-2.pdf [file NIHMS256405-supplement-2.pdf]

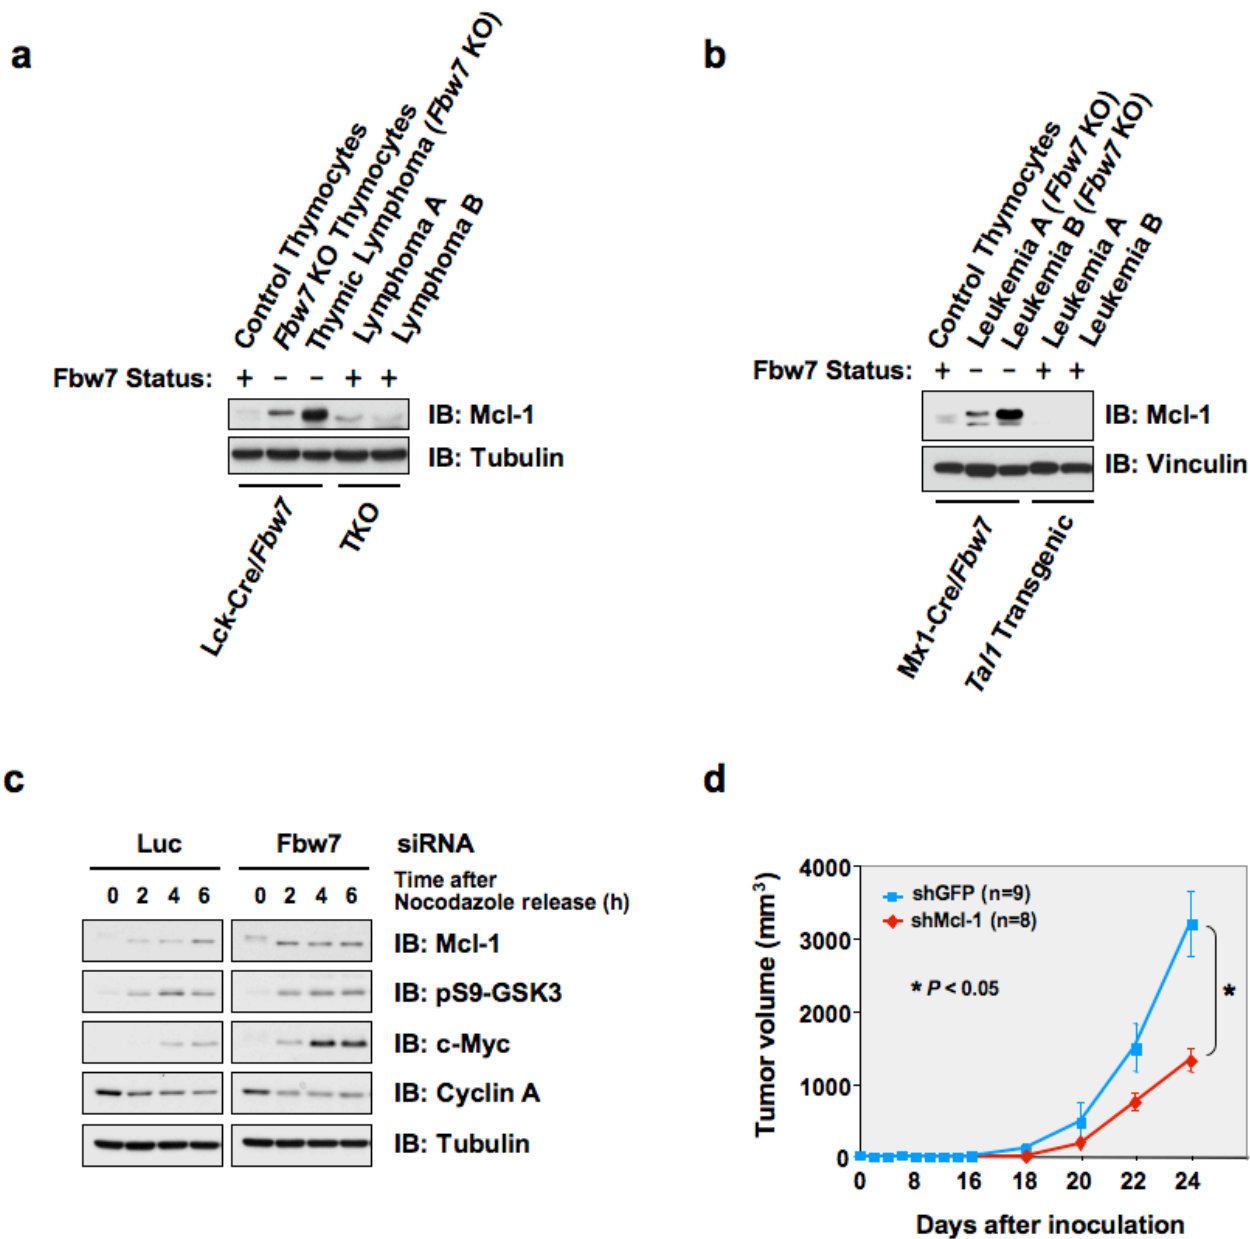

**Supplementary Figure 1: Depletion of Fbw7 results in elevated Mcl-1 abundance.**

- a**, Total thymocytes from 8-wk-old *Lck-Cre/Fbw7<sup>+/fl</sup>* (Control) or *Lck-Cre/Fbw7<sup>fl/fl</sup>* (*Fbw7* KO) mice were subjected to immunoblot analysis with the indicated antibodies. Thymic lymphoma cells were from a 15-wk-old *Lck-Cre/Fbxw7<sup>fl/fl</sup>* (*Fbw7* KO) and *Terc<sup>-/-</sup>ATM<sup>-/-</sup>p53<sup>-/-</sup>* (TKO) mice.
- b**, Total thymocytes from 12-wk-old *Mx1-Cre/Fbw7<sup>+/fl</sup>* (Control), leukemic *Fbw7* KO or *Tal1* transgenic mice were subjected to immunoblot analysis with the indicated antibodies.
- c**, Immunoblot analysis of HeLa cells transfected with the indicated siRNA oligos after synchronization with nocodazole and release.
- d**, *In vivo* effects of Mcl-1 depletion in *Fbw7*-deficient T-ALL cells. An *in vivo* xenograft model of *Fbw7*-deficient T-ALL was created by subcutaneous injection of  $1.2 \times 10^7$  CMLT1 cells (CMLT1-shGFP or CMLT1-shMcl-1) in SCID mice. Tumor burden was determined by measuring the diameters of the tumor size. The tumor volume was calculated by using the formula,  $1/2 \times (\text{tumor length}) \times (\text{tumor width})^2$ . Data was represented as the mean of tumor volume (mm<sup>3</sup>)  $\pm$  SEM with statistical significance determined by Student's t-test.

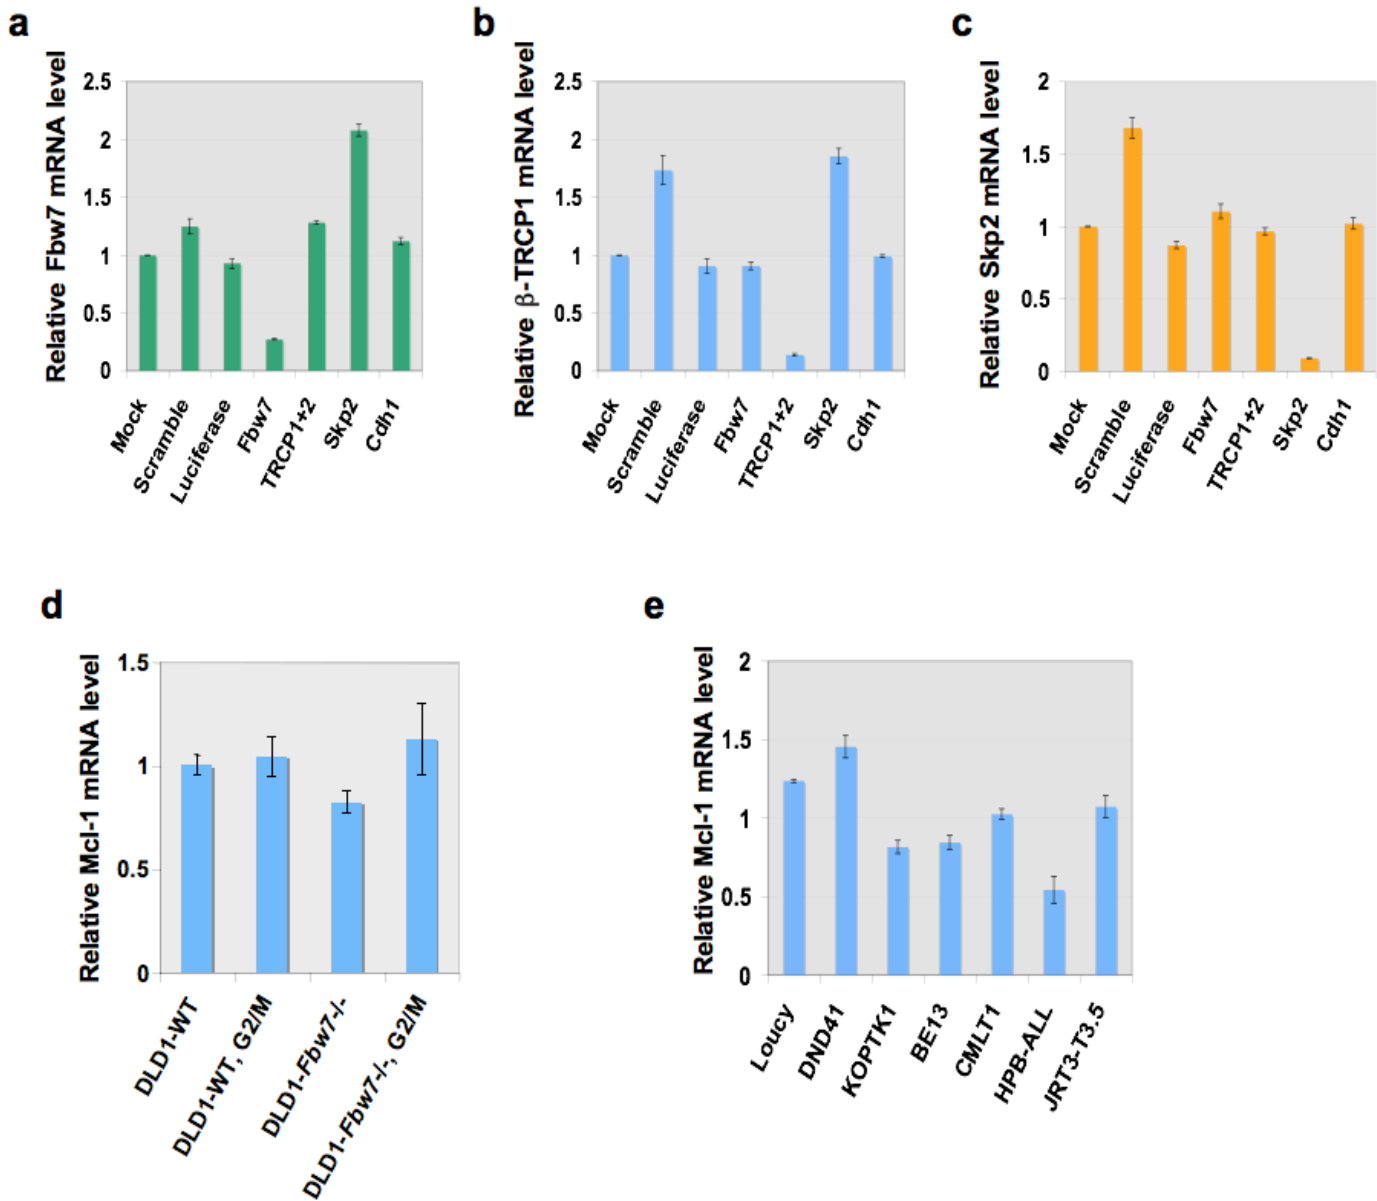

**Supplementary Figure 2: Inactivation of Fbw7 does not affect Mcl-1 mRNA expression levels.**

**a-c**, Real-time RT-PCR analysis to examine the depletion efficiency of the siRNA oligos against Fbw7 (**a**),  $\beta$ -TRCP1 (**b**) and Skp2 (**c**) used in Figure 1**b**. Data was shown as mean  $\pm$  SD for three independent experiments.

**d**, Real-time RT-PCR analysis to examine the relative Mcl-1 mRNA expression levels in wild-type (WT) and *Fbw7*<sup>-/-</sup> DLD1 cells. Data was shown as mean  $\pm$  SD for three independent experiments.

**e**, Real-time RT-PCR analysis to examine the relative Mcl-1 mRNA expression levels in various T-ALL cell lines. Data was shown as mean  $\pm$  SD for three independent experiments.

**a**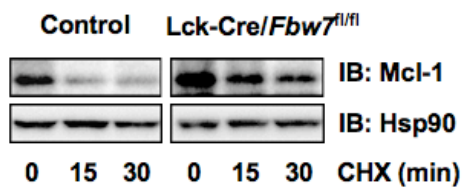**b**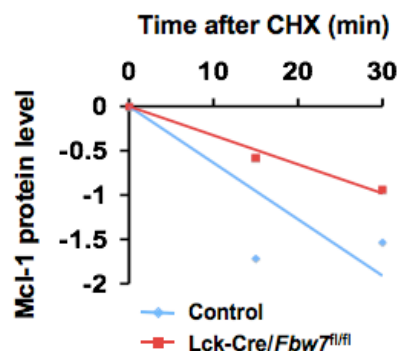**c**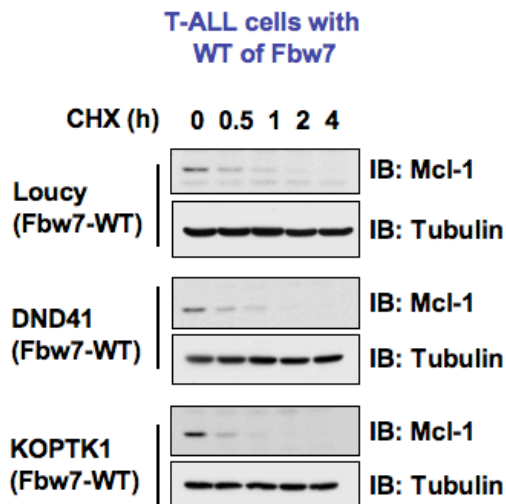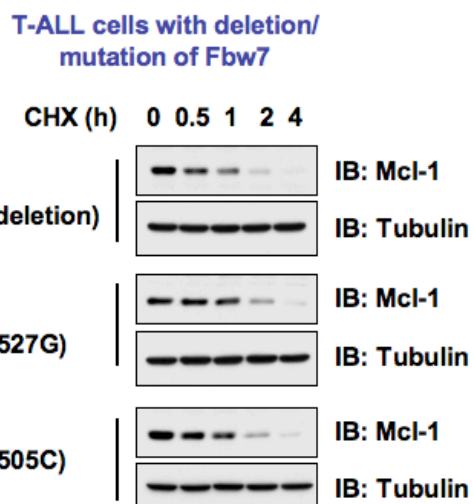**d**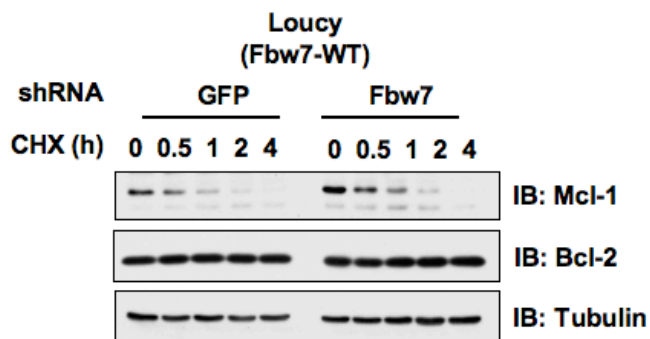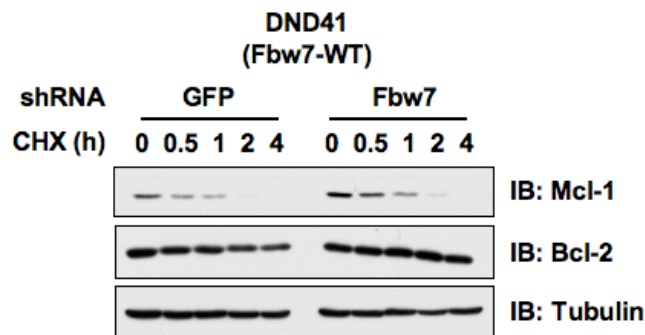**e**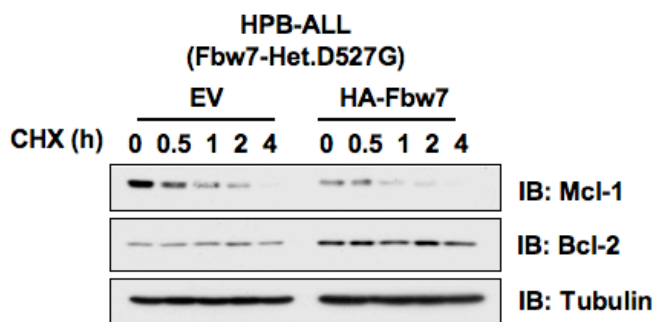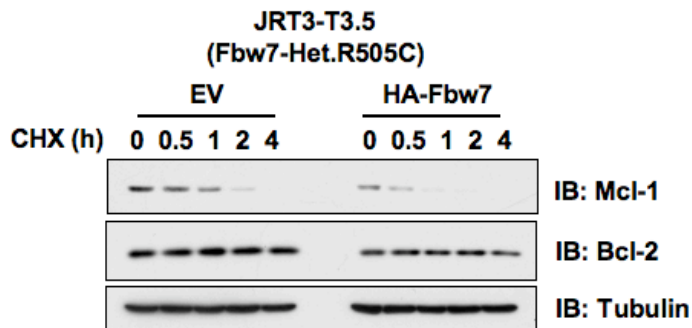

**Supplementary Figure 3: Mcl-1 half-life is controlled by Fbw7.**

- a-b**, The thymocytes from 8-wk-old Lck-Cre/*Fbw7*<sup>+/*fl*</sup> (Control) or Lck-Cre/*Fbw7*<sup>fl/*fl*</sup> (*Fbw7* KO) were treated with 100 µg/ml cycloheximide (CHX). At the indicated time points, whole cell lysates were prepared and immunoblots were probed with the indicated antibodies (**a**). Band intensity was measured, normalized by that of Hsp90, and expressed as a percentage of the corresponding normalized value for time zero (**b**).
- c**, The indicated T-ALL cell lines were treated with 20 µg/ml cycloheximide (CHX). At the indicated time points, whole cell lysates were prepared and immunoblots were probed with the indicated antibodies.
- d**, DND41 and Loucy cells, which contain wild-type *Fbw7*, were infected with the indicated lentiviral shRNA construct and selected with 1 µg/ml puromycin to eliminate the non-infected cells. Afterwards, the indicated cell lines were treated with 20 µg/ml cycloheximide (CHX). At the indicated time points, whole cell lysates were prepared and immunoblots were probed with the indicated antibodies.
- e**, HPB-ALL and JRT3-T3.5 cells with deficient *Fbw7* were infected with the *Fbw7*-expressing retrovirus construct (or an empty vector as a negative control) and selected with 1 µg/ml puromycin to eliminate the non-infected cells. Afterwards, the indicated cell lines were treated with 20 µg/ml cycloheximide (CHX). At the indicated time points, whole cell lysates were prepared and immunoblots were probed with the indicated antibodies.

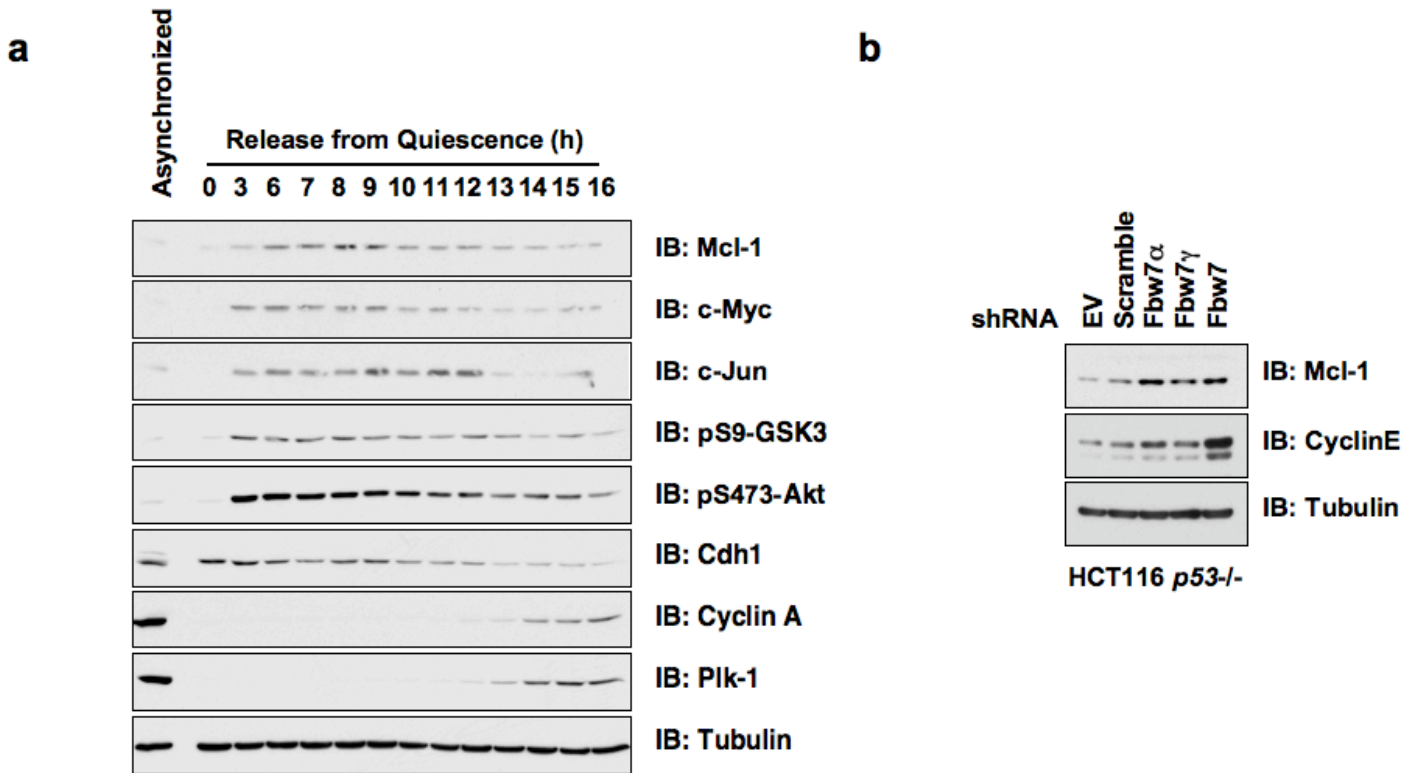

**Supplementary Figure 4: Endogenous Mcl-1 levels inversely correlate with GSK3 activity during cell cycle progression, and Fbw7 depletion-induced Mcl-1 upregulation is p53 independent.**

- a.** Immunoblot analysis of T98G cells induced to enter the G0 phase by serum starvation for 72 hours and then released for the indicated time periods.
- b.** Immunoblot analysis of HCT116 *p53*<sup>-/-</sup> cells transfected with the indicated shRNA constructs.

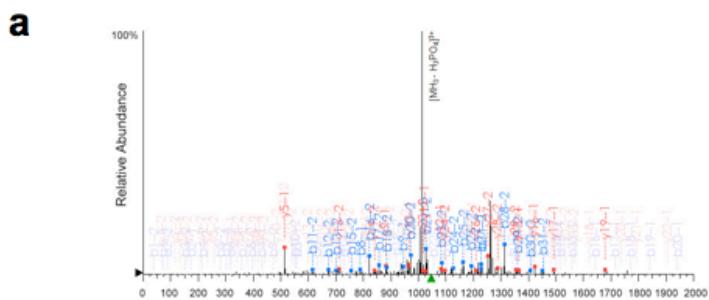

Predicted Fragmentation Pattern

| +1              |         |         |    | +2              |         |         |    |
|-----------------|---------|---------|----|-----------------|---------|---------|----|
| Seq #           | b       | y       | +1 | Seq #           | b       | y       | +1 |
| A 1             | 72.05   | ---     | 33 | A 1             | 36.53   | ---     | 33 |
| T 2             | 173.09  | 3063.44 | 32 | T 2             | 87.05   | 1532.23 | 32 |
| E 3             | 302.14  | 2962.40 | 31 | E 3             | 151.57  | 1481.70 | 31 |
| K 4             | 430.23  | 2833.35 | 30 | K 4             | 215.62  | 1417.18 | 30 |
| E 5             | 556.27  | 2705.26 | 29 | E 5             | 280.14  | 1353.13 | 29 |
| A 6             | 630.31  | 2576.22 | 28 | A 6             | 315.66  | 1288.61 | 28 |
| S 7             | 717.33  | 2505.18 | 27 | S 7             | 359.17  | 1253.09 | 27 |
| A 8             | 788.37  | 2418.16 | 26 | A 8             | 394.69  | 1209.58 | 26 |
| R 9             | 944.47  | 2347.12 | 25 | R 9             | 472.74  | 1174.06 | 25 |
| R 10            | 1100.57 | 2191.02 | 24 | R 10            | 550.79  | 1096.01 | 24 |
| E 11            | 1229.61 | 2034.92 | 23 | E 11            | 615.31  | 1017.96 | 23 |
| I 12            | 1342.70 | 1905.87 | 22 | I 12            | 671.85  | 953.44  | 22 |
| G 13            | 1399.72 | 1792.79 | 21 | G 13            | 700.36  | 896.90  | 21 |
| G 14            | 1456.74 | 1735.77 | 20 | G 14            | 726.87  | 868.39  | 20 |
| G 15            | 1513.76 | 1678.75 | 19 | G 15            | 757.39  | 839.88  | 19 |
| E 16            | 1642.81 | 1621.73 | 18 | E 16            | 821.91  | 811.37  | 18 |
| A 17            | 1713.84 | 1492.68 | 17 | A 17            | 857.43  | 746.85  | 17 |
| G 18            | 1770.86 | 1421.65 | 16 | G 18            | 885.94  | 711.33  | 16 |
| A 19            | 1841.90 | 1364.62 | 15 | A 19            | 921.45  | 682.82  | 15 |
| V 20            | 1940.97 | 1293.59 | 14 | V 20            | 970.99  | 647.30  | 14 |
| I 21            | 2054.05 | 1194.52 | 13 | I 21            | 1027.53 | 597.76  | 13 |
| G 22            | 2111.08 | 1081.43 | 12 | G 22            | 1056.04 | 541.22  | 12 |
| G 23            | 2168.10 | 1024.41 | 11 | G 23            | 1084.55 | 512.71  | 11 |
| S 24            | 2255.12 | 967.39  | 10 | S 24            | 1128.06 | 484.20  | 10 |
| A 25            | 2326.16 | 880.37  | 9  | A 25            | 1163.58 | 480.69  | 9  |
| G 26            | 2383.18 | 809.33  | 8  | G 26            | 1192.09 | 405.17  | 8  |
| A 27            | 2454.22 | 752.31  | 7  | A 27            | 1227.61 | 376.66  | 7  |
| S <sup>28</sup> | 2621.21 | 681.27  | 6  | S <sup>28</sup> | 1311.11 | 341.14  | 6  |
| P 29            | 2718.26 | 514.20  | 5  | P 29            | 1359.63 | 257.65  | 5  |
| P 30            | 2815.31 | 417.23  | 4  | P 30            | 1408.16 | 209.12  | 4  |
| S 31            | 2902.33 | 320.18  | 3  | S 31            | 1451.67 | 160.59  | 3  |
| T 32            | 3003.38 | 233.15  | 2  | T 32            | 1502.19 | 117.08  | 2  |
| L 33            | ---     | 132.11  | 1  | L 33            | ---     | 66.56   | 1  |

**ATEKEASARRE IGGGEAGAV IGG SAGASPSTL**

z = 3  
PPM = -1.92  
XCorr = 3.356  
Ascore = 16.58

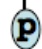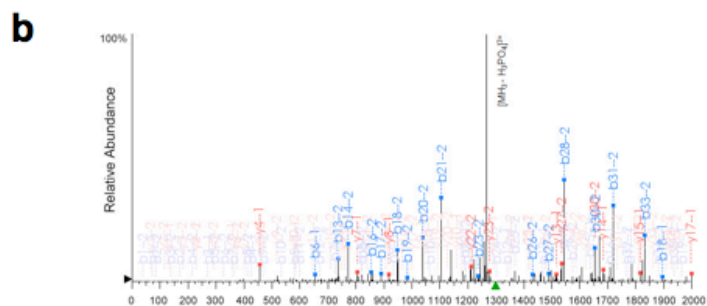

Predicted Fragmentation Pattern

| +1              |         |         |    | +2              |         |         |    |
|-----------------|---------|---------|----|-----------------|---------|---------|----|
| Seq #           | b       | y       | +1 | Seq #           | b       | y       | +1 |
| A 1             | 72.05   | ---     | 35 | A 1             | 36.53   | ---     | 35 |
| P 2             | 169.10  | 3820.69 | 34 | P 2             | 85.05   | 1910.85 | 34 |
| T 3             | 270.15  | 3723.64 | 33 | T 3             | 135.58  | 1862.32 | 33 |
| R 4             | 426.25  | 3622.59 | 32 | R 4             | 213.63  | 1811.80 | 32 |
| R 5             | 582.35  | 3466.49 | 31 | R 5             | 291.68  | 1733.75 | 31 |
| A 6             | 653.38  | 3310.39 | 30 | A 6             | 327.20  | 1655.70 | 30 |
| A 7             | 724.42  | 3239.35 | 29 | A 7             | 362.71  | 1620.18 | 29 |
| P 8             | 821.47  | 3168.32 | 28 | P 8             | 411.24  | 1584.66 | 28 |
| L 9             | 934.56  | 3071.26 | 27 | L 9             | 467.78  | 1536.14 | 27 |
| E 10            | 1063.60 | 2958.18 | 26 | E 10            | 532.30  | 1479.59 | 26 |
| E 11            | 1192.64 | 2829.14 | 25 | E 11            | 596.83  | 1415.07 | 25 |
| M <sup>12</sup> | 1339.68 | 2700.09 | 24 | M <sup>12</sup> | 670.34  | 1350.55 | 24 |
| E 13            | 1468.72 | 2553.06 | 23 | E 13            | 734.86  | 1277.03 | 23 |
| A 14            | 1539.76 | 2424.02 | 22 | A 14            | 770.38  | 1212.51 | 22 |
| P 15            | 1636.81 | 2352.98 | 21 | P 15            | 818.91  | 1176.99 | 21 |
| A 16            | 1707.85 | 2255.93 | 20 | A 16            | 854.43  | 1128.47 | 20 |
| A 17            | 1778.89 | 2184.89 | 19 | A 17            | 889.95  | 1092.95 | 19 |
| D 18            | 1893.91 | 2113.85 | 18 | D 18            | 947.46  | 1057.43 | 18 |
| A 19            | 1964.95 | 1998.83 | 17 | A 19            | 982.98  | 999.92  | 17 |
| I 20            | 2078.03 | 1927.79 | 16 | I 20            | 1039.52 | 964.40  | 16 |
| M 21            | 2209.07 | 1814.70 | 15 | M 21            | 1105.04 | 907.86  | 15 |
| S <sup>22</sup> | 2376.06 | 1683.66 | 14 | S <sup>22</sup> | 1188.54 | 842.34  | 14 |
| P 23            | 2473.12 | 1516.67 | 13 | P 23            | 1237.06 | 758.84  | 13 |
| E 24            | 2602.16 | 1419.62 | 12 | E 24            | 1301.58 | 710.31  | 12 |
| E 25            | 2731.20 | 1290.58 | 11 | E 25            | 1366.10 | 645.79  | 11 |
| E 26            | 2860.24 | 1161.54 | 10 | E 26            | 1430.63 | 581.27  | 10 |
| L 27            | 2973.33 | 1032.49 | 9  | L 27            | 1487.17 | 516.75  | 9  |
| D 28            | 3088.38 | 919.41  | 8  | D 28            | 1544.68 | 460.21  | 8  |
| G 29            | 3145.38 | 804.38  | 7  | G 29            | 1573.19 | 402.70  | 7  |
| Y 30            | 3308.44 | 747.36  | 6  | Y 30            | 1654.72 | 374.18  | 6  |
| E 31            | 3437.48 | 584.30  | 5  | E 31            | 1719.25 | 292.65  | 5  |
| P 32            | 3534.54 | 455.26  | 4  | P 32            | 1767.77 | 228.13  | 4  |
| E 33            | 3663.58 | 358.20  | 3  | E 33            | 1832.29 | 179.61  | 3  |
| P 34            | 3760.63 | 229.16  | 2  | P 34            | 1880.82 | 115.08  | 2  |
| L 35            | ---     | 132.11  | 1  | L 35            | ---     | 66.56   | 1  |

**APTRRAPLEEMEAPAADA IMSPEELDGYEPEPL**

z = 3  
PPM = 3.36  
XCorr = 2.864  
Ascore = 19.00

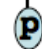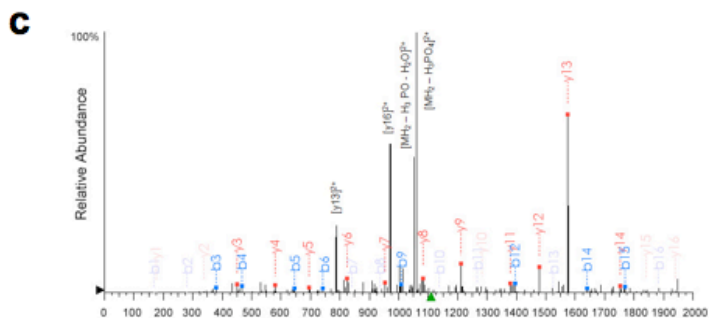

Predicted Fragmentation Pattern

| Seq #          | b       | y       | +1 |
|----------------|---------|---------|----|
| S <sup>1</sup> | 168.00  | ---     | 18 |
| L 2            | 281.08  | 2051.88 | 17 |
| P 3            | 378.13  | 1938.80 | 16 |
| S 4            | 465.16  | 1841.74 | 15 |
| T <sup>5</sup> | 646.17  | 1754.72 | 14 |
| P 6            | 743.22  | 1573.71 | 13 |
| P 7            | 840.28  | 1476.65 | 12 |
| P 8            | 937.33  | 1379.60 | 11 |
| A 9            | 1008.37 | 1282.55 | 10 |
| E 10           | 1137.41 | 1211.51 | 9  |
| E 11           | 1266.45 | 1082.47 | 8  |
| E 12           | 1395.49 | 953.43  | 7  |
| E 13           | 1524.54 | 824.38  | 6  |
| D 14           | 1639.56 | 695.34  | 5  |
| E 15           | 1768.61 | 580.31  | 4  |
| L 16           | 1881.69 | 451.27  | 3  |
| Y 17           | 2044.75 | 338.19  | 2  |
| R 18           | ---     | 175.12  | 1  |

**SLPSTPPPAEEEEDELRY**

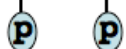

z = 2  
PPM = -0.53  
XCorr = 3.964  
Ascore = 28.87/28.87

**d**

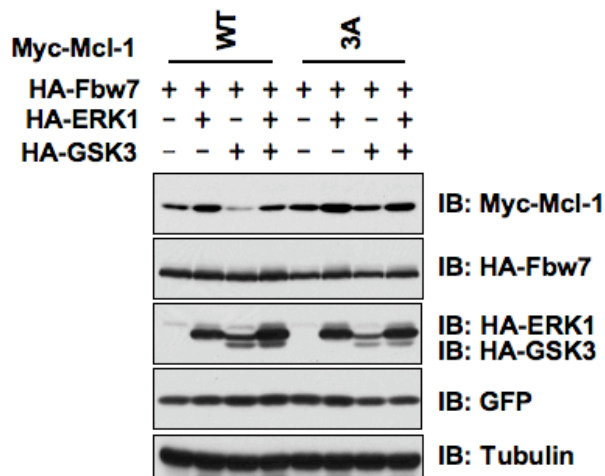

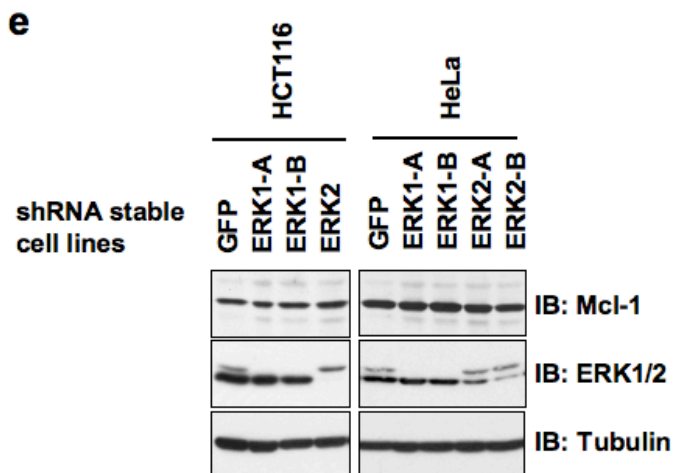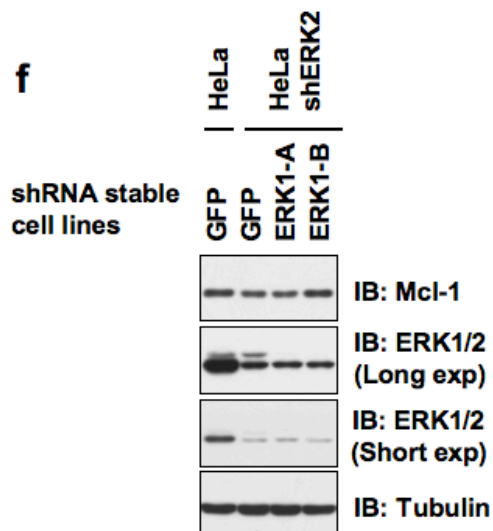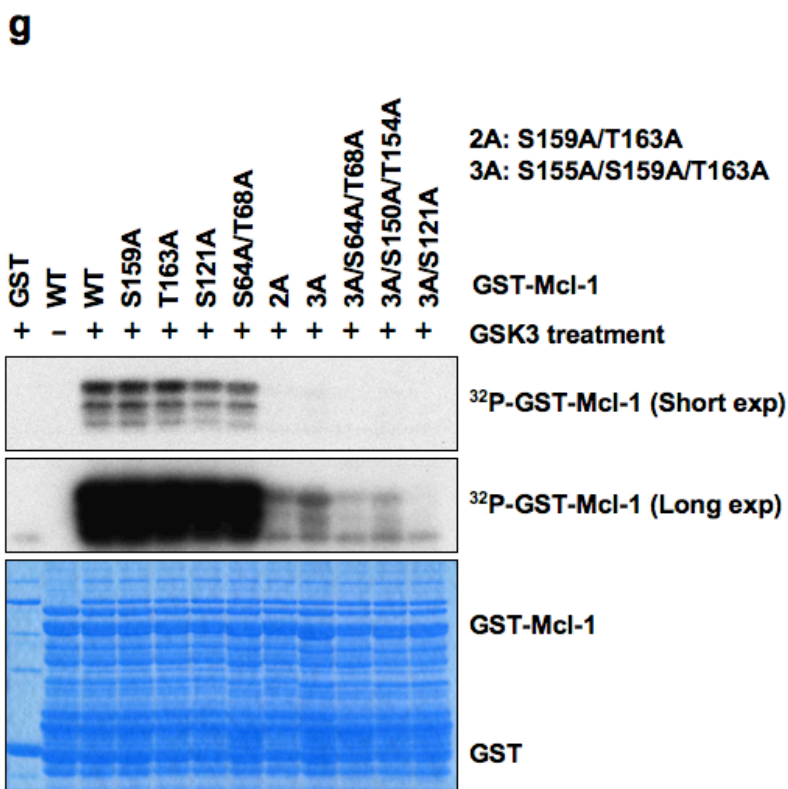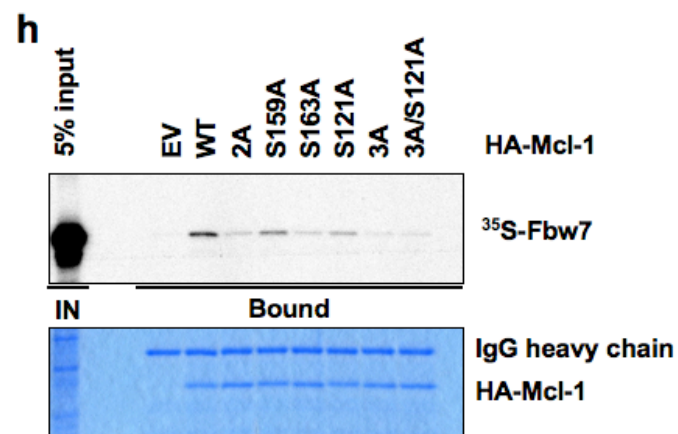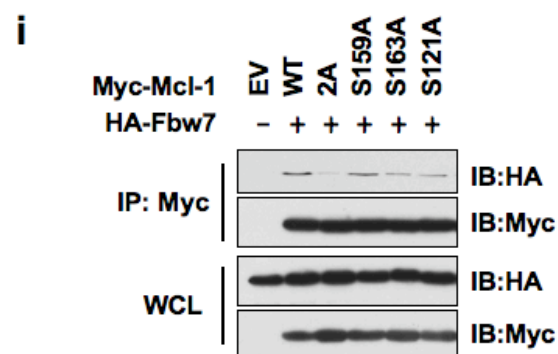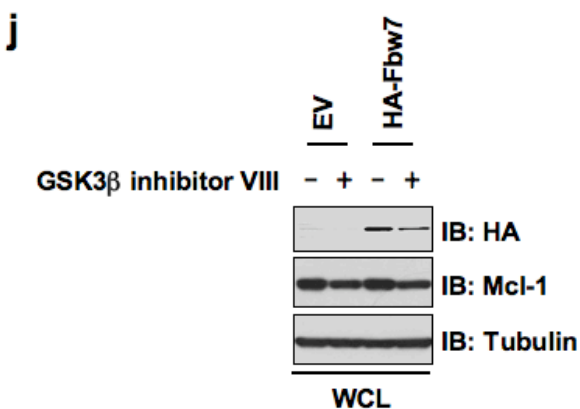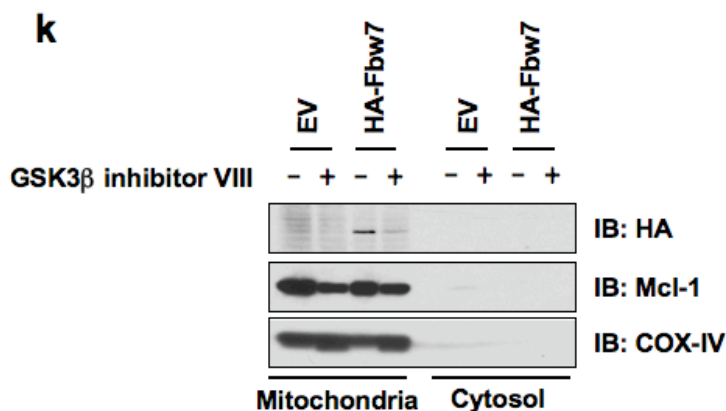

**Supplementary Figure 5: Phosphorylation of Mcl-1 by GSK3 triggers Mcl-1/Fbw7 interaction.**

- a-c,** Detection of *in vivo* Mcl-1 phosphorylation status by mass spectrum analysis. HA-Mcl-1 was transfected into 293T cells, then immunoprecipitated with anti-HA in the presence of phosphatase inhibitors. The immunoprecipitate was resolved by SDS-PAGE and phosphorylation was detected by mass spectrum analysis. The Ser64 site (**a**), Ser121 site (**b**), Ser159 and Thr163 sites (**c**) were detected to be phosphorylated *in vivo*.
- d,** Immunoblot analysis of 293T cells transfected with the indicated Myc-Mcl-1 and HA-Fbw7 plasmids in the presence or absence of HA-GSK3 and/or HA-ERK1. A plasmid encoding GFP was used as a negative control for transfection efficiency.
- e-f,** HeLa or HCT116 cells were infected with the indicated lentiviral shRNA constructs (with shGFP as a negative control) and selected with 1  $\mu$ g/ml puromycin to eliminate the non-infected cells. Whole cell lysates were collected for immunoblot analysis.
- g,** GSK3 phosphorylates Mcl-1 *in vitro* at multiple sites. Purified GSK3 protein (from New England Biolabs) was incubated with 5  $\mu$ g of the indicated GST-Mcl-1 proteins in the presence of  $\gamma$ -<sup>32</sup>P-ATP. The kinase reaction products were resolved by SDS-PAGE and phosphorylation was detected by autoradiography.
- h,** Phosphorylation of Mcl-1 at multiple sites *in vivo* triggers its interaction with Fbw7 *in vitro*. Autoradiograms showing recovery of <sup>35</sup>S-labeled Fbw7 protein bound to the indicated HA-Mcl-1 proteins immunoprecipitated from 293T cells. IN, input (5% as indicated).
- i,** Immunoblot (IB) analysis of whole cell lysates (WCL) and immunoprecipitates (IP) derived from 293T cells transfected with HA-Fbw7 together with the indicated Myc-Mcl-1 constructs. Thirty hours post-transfection, cells were pretreated with 10  $\mu$ M MG132 for 10 hours to block the proteasome pathway before harvesting.
- j-k,** HeLa cells were transfected with the pcDNA3-HA-Fbw7 construct (with empty vector as a negative control) and selected with 800  $\mu$ g/ml G418 to generate a cell line stably expressing HA-Fbw7. Cells were pretreated with 20  $\mu$ M MG132 for 8 hours to block the proteasome pathway before harvesting. Where indicated, 25  $\mu$ M of the GSK3 $\beta$  inhibitor VIII (with DMSO as a negative control) was added for 8 hours before harvesting for immunoblot analysis (**j**). Under the same experimental conditions, another set of cells were collected and mitochondrial and cytosolic fractions were separated by ultracentrifuge before immunoblot analysis with the indicated antibodies (**k**).



**a**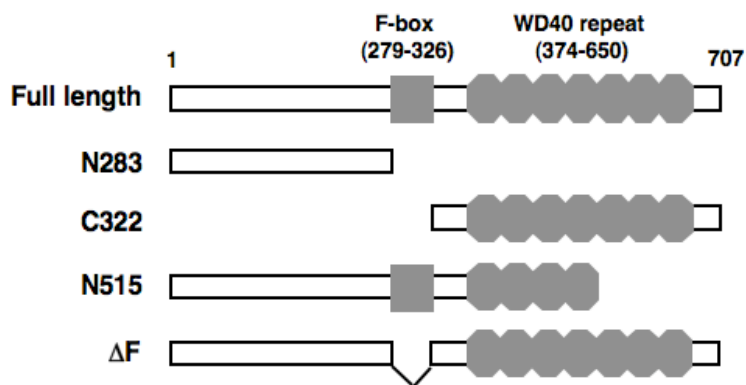**b**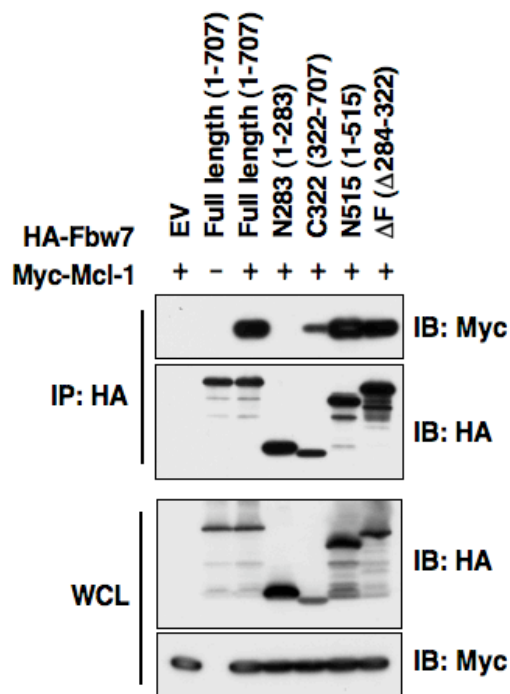**c**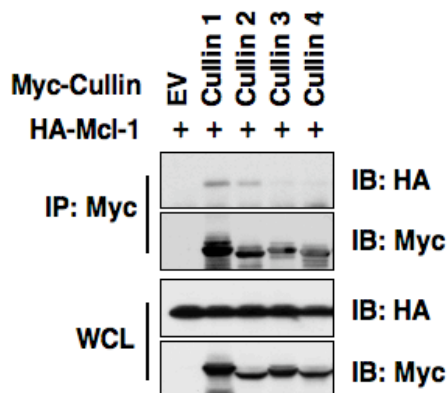**d**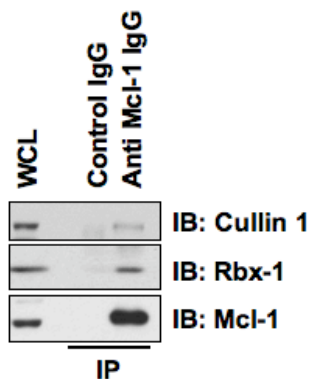**e**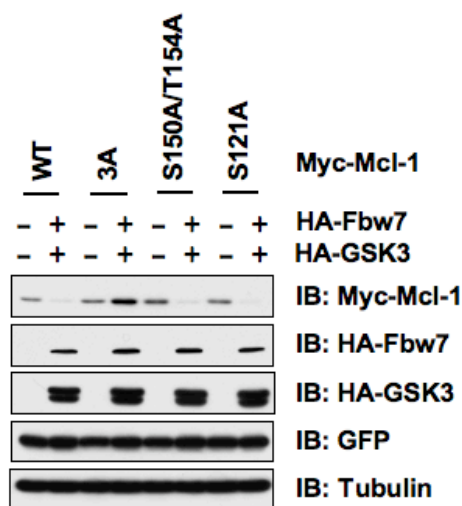**f**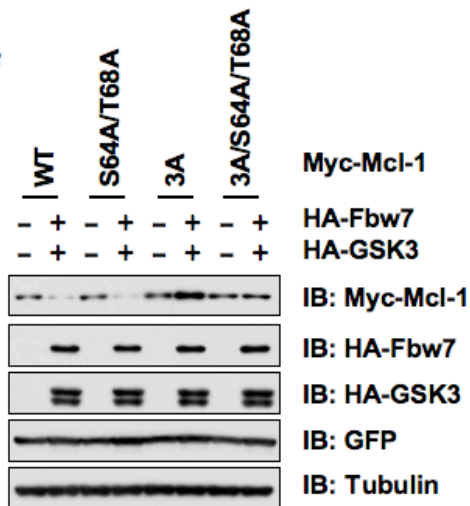**g**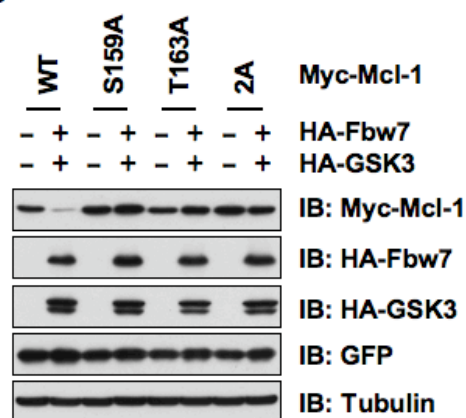

**h**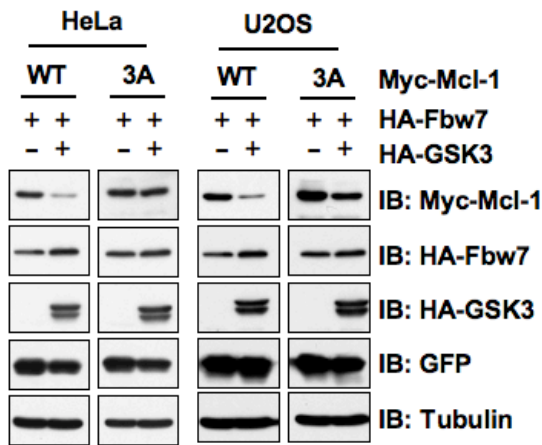**i**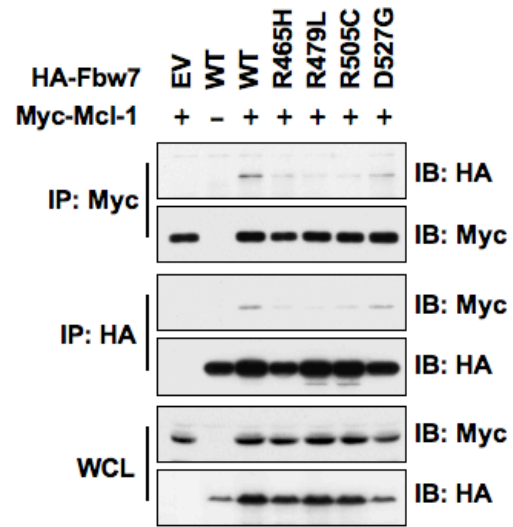**j**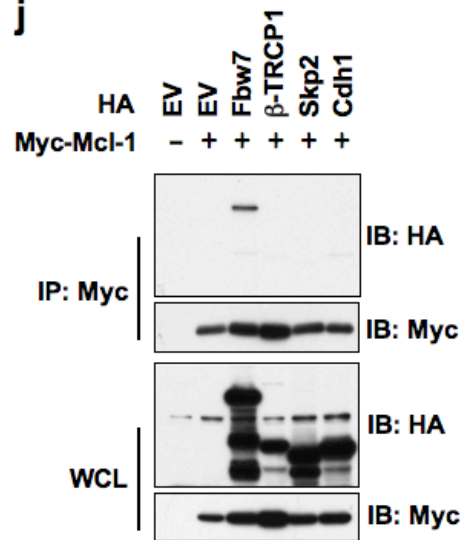**k**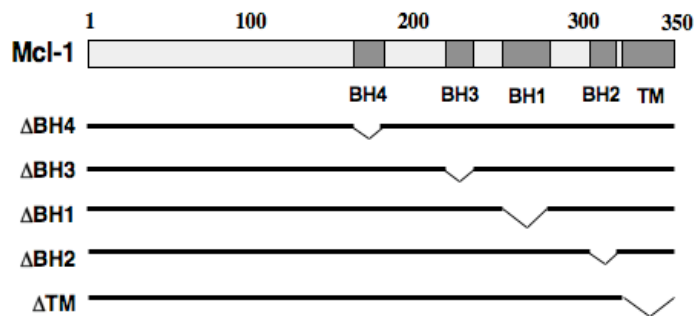**l**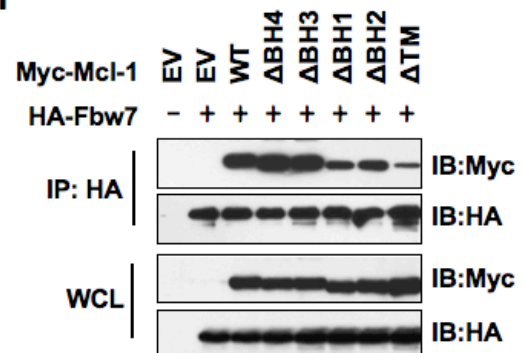

**Supplementary Figure 6: Mcl-1 interacts specifically with Cullin 1 and Fbw7 *in vivo*.**

- a**, Illustration of the various Fbw7 deletion constructs used in **b**.
- b**, Immunoblot (IB) analysis of whole cell lysates (WCL) and immunoprecipitates (IP) derived from 293T cells transfected with Myc-Mcl-1 and various HA-tagged Fbw7 constructs. Twenty hours post-transfection, cells were treated with 10  $\mu$ M MG132 overnight before harvesting.
- c**, Immunoblot (IB) analysis of whole cell lysates (WCL) and immunoprecipitates (IP) derived from 293T cells transfected with HA-Mcl-1 and various Myc-tagged Cullin constructs. Twenty hours post-transfection, cells were treated with 10  $\mu$ M MG132 overnight before harvesting.
- d**, Immunoblot (IB) analysis of HEK-293 whole cell lysates (WCL) and anti-Mcl-1 immunoprecipitates (IP). Mouse IgG was used as a negative control for the immunoprecipitation procedure. Cells were treated with 10  $\mu$ M MG132 overnight before harvesting.
- e-g**, Immunoblot analysis of 293T cells transfected with the indicated Myc-Mcl-1 and HA-Fbw7 plasmids in the presence or absence of HA-GSK3. A plasmid encoding GFP was used as a negative control for transfection efficiency.
- h**, Immunoblot analysis of HeLa or U2OS cells transfected with the indicated Myc-Mcl-1 and HA-Fbw7 plasmids in the presence or absence of HA-GSK3. A plasmid encoding GFP was used as a negative control for transfection efficiency.
- i**, Immunoblot (IB) analysis of whole cell lysates (WCL) and immunoprecipitates (IP) derived from HeLa cells transfected with HA-tagged Fbw7 and the indicated Myc-Mcl-1 constructs. Twenty hours post-transfection, cells were treated with 330 nM Nocodazole for 18 hours to arrest cells in the M phase and 25  $\mu$ M MG132 for 8 hours before harvesting.
- j**, Immunoblot (IB) analysis of whole cell lysates (WCL) and immunoprecipitates (IP) derived from 293T cells transfected with Myc-Mcl-1 and the indicated HA-tagged F-box protein constructs (or HA-Cdh1 as a negative control ). Twenty hours post-transfection, cells were treated with 330 nM Nocodazole for 18 hours to arrest cells in the M phase and 25  $\mu$ M MG132 for 8 hours before harvesting.
- k**, Illustration of the various Mcl-1 deletion constructs used in **l**.
- l**, Immunoblot (IB) analysis of whole cell lysates (WCL) and immunoprecipitates (IP) derived from 293T cells transfected with HA-Fbw7 and various Myc-Mcl-1 constructs. Twenty hours post-transfection, cells were treated with 10  $\mu$ M MG132 overnight before harvesting. IP analyses were performed to demonstrate the role of the individual BH domains and the transmembrane domain in mediating Mcl-1/Fbw7 interaction. Deletion of the BH3 or BH4 domains was found to have no effect on Mcl-1/Fbw7 interaction, and deletion of the BH1 or BH2 domains only moderately decreased Mcl-1/Fbw7 interaction. On the other hand, deletion of the transmembrane domain has a more dramatic effect on Mcl-1/Fbw7 interaction.

**a**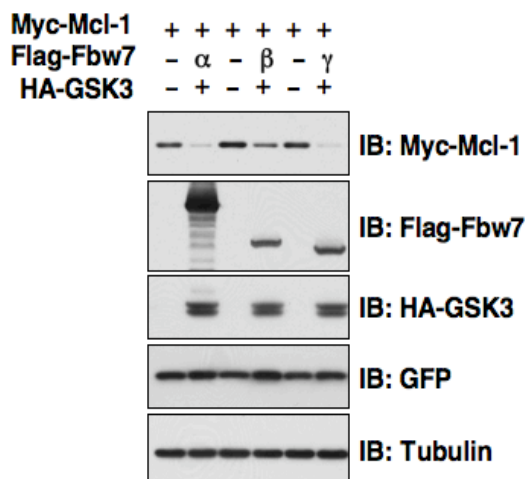**b**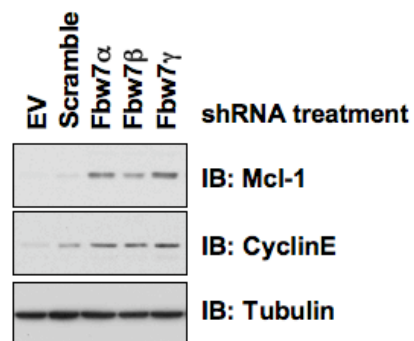**c**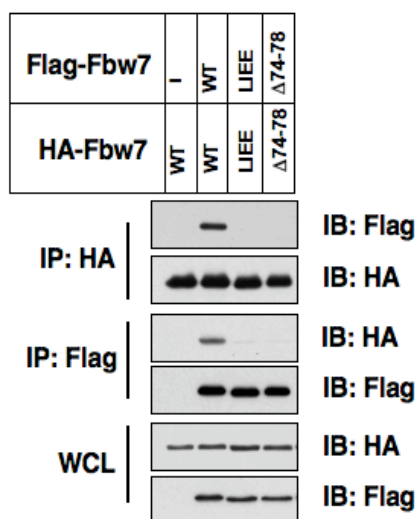**d**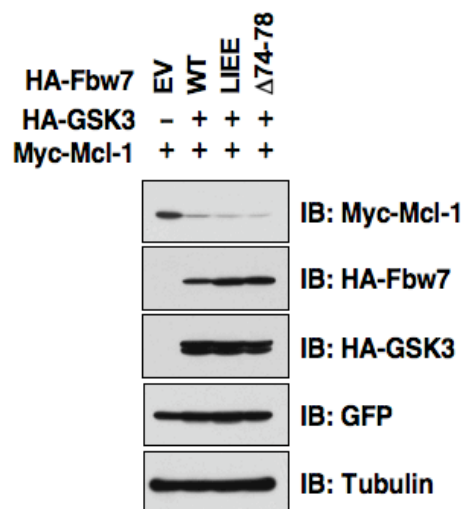**e**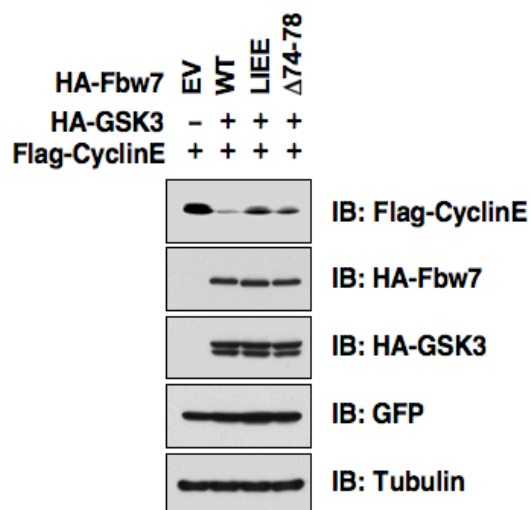

**Supplementary Figure 7: Fbw7 isoform specificity and dimerization requirement for its ability to promote Mcl-1 destruction.**

- a,** Immunoblot analysis of 293T cells transfected with the indicated Myc-Mcl-1 and Flag-Fbw7 plasmids in the presence or absence of HA-GSK3. A plasmid encoding GFP was used as a negative control for transfection efficiency.
- b,** HEK-293 cells were transfected with the indicated shRNA constructs. Whole cell lysates were collected for immunoblot analysis.
- c,** Immunoblot (IB) analysis of whole cell lysates (WCL) and immunoprecipitates (IP) derived from 293T cells transfected with the indicated HA-tagged and Flag-tagged Fbw7 constructs. Twenty hours post-transfection, cells were treated with 10  $\mu$ M MG132 overnight before harvesting. LIEE, Fbw7 $\alpha$ <sup>L256E/1257E</sup>
- d,** Immunoblot analysis of 293T cells transfected with the indicated Myc-Mcl-1 and HA-Fbw7 plasmids in the presence or absence of HA-GSK3. A plasmid encoding GFP was used as a negative control for transfection efficiency.
- e,** Immunoblot analysis of 293T cells transfected with the indicated Flag-Cyclin E and HA-Fbw7 plasmids in the presence or absence of HA-GSK3. A plasmid encoding GFP was used as a negative control for transfection efficiency.

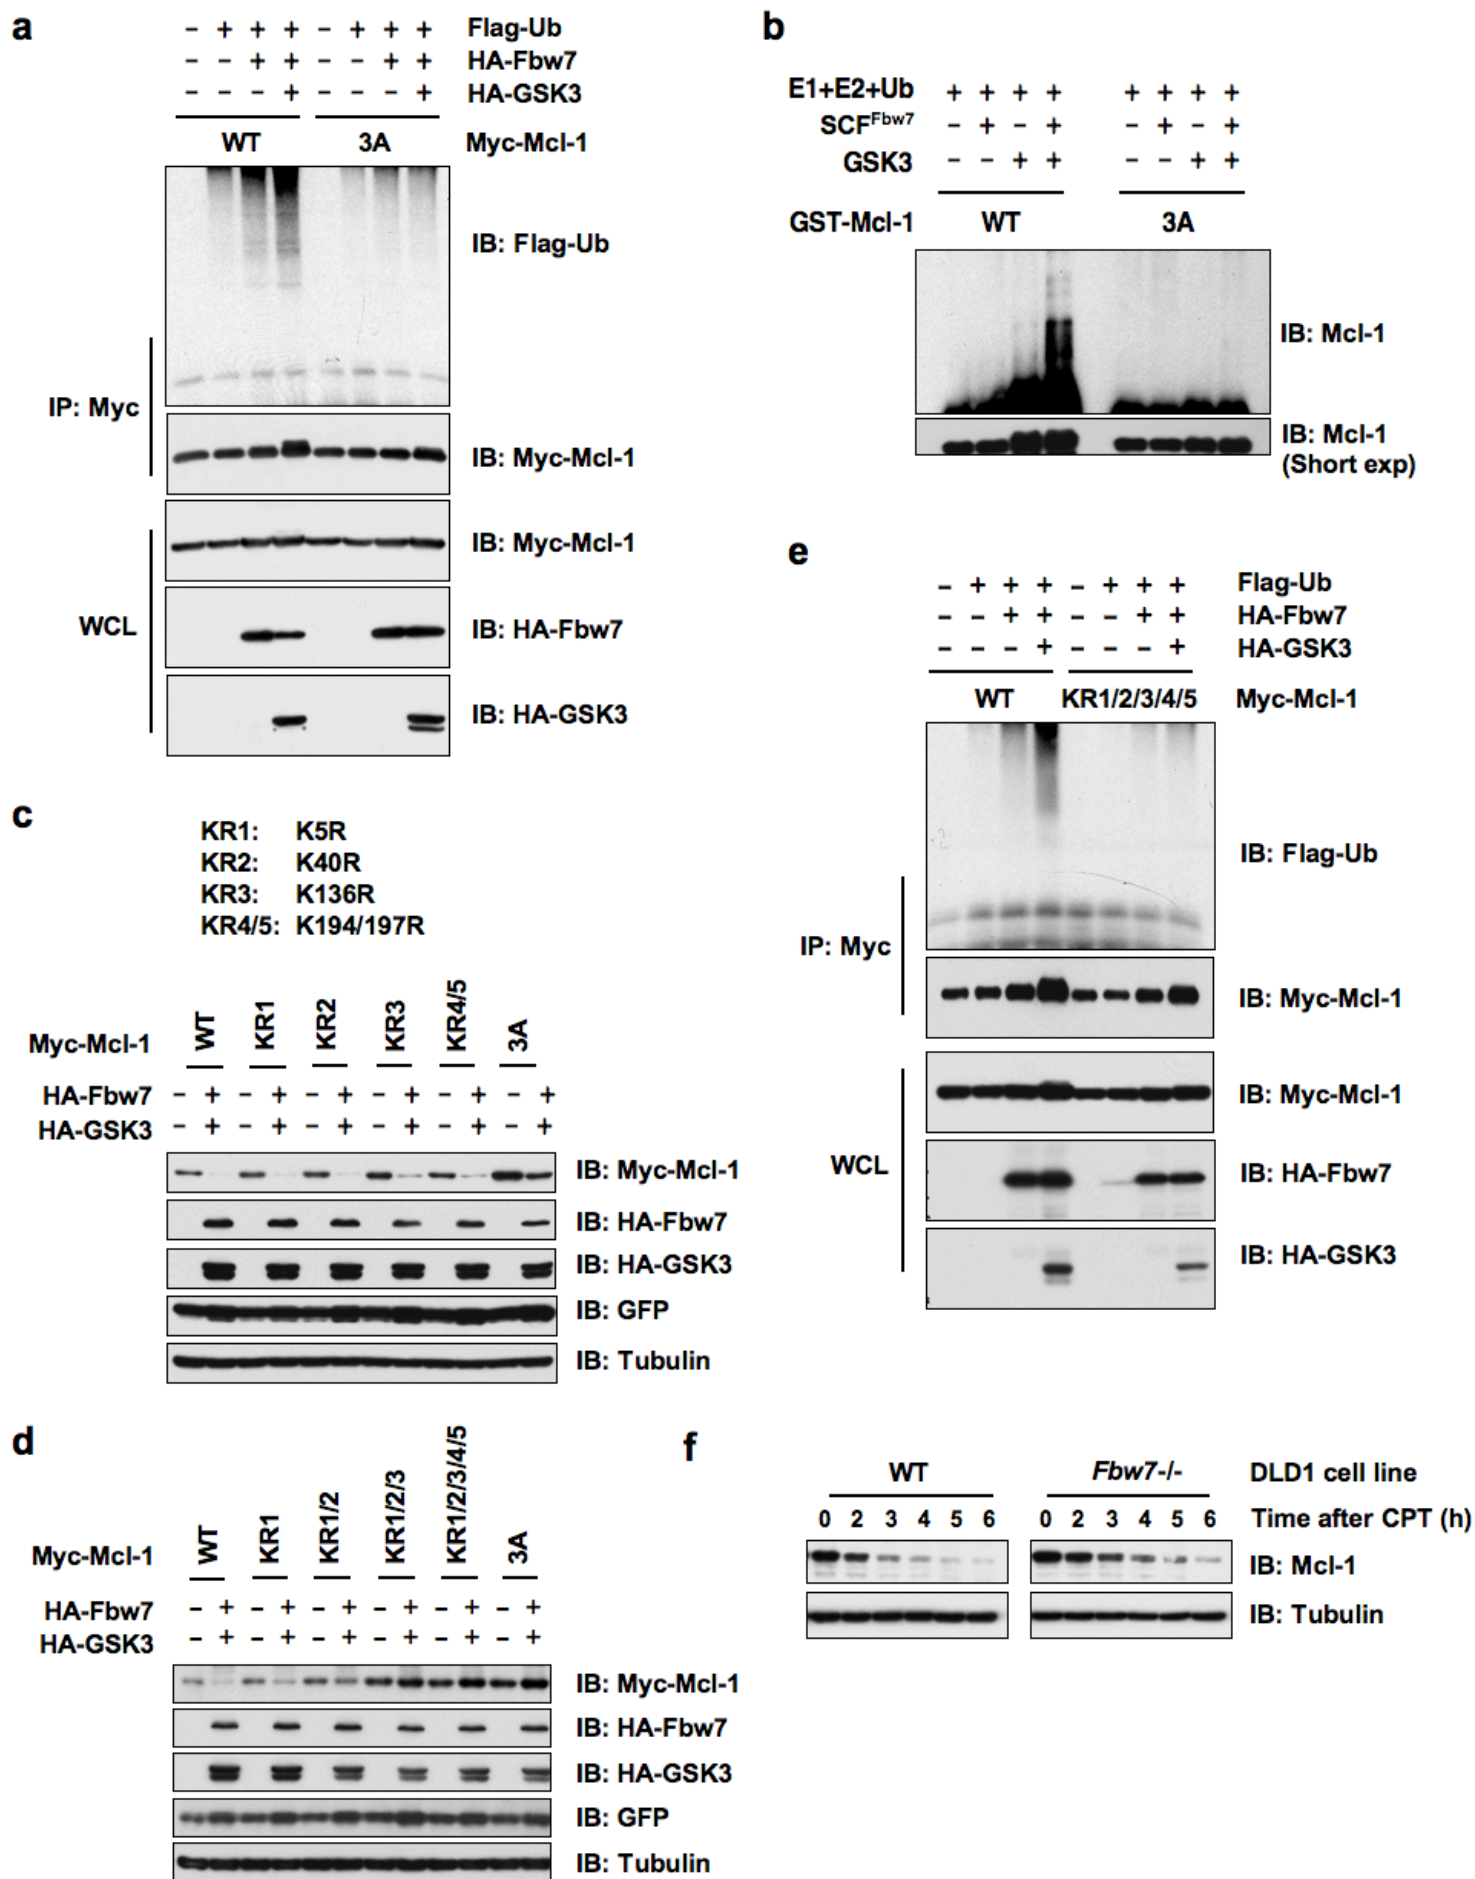

**Supplementary Figure 8: Fbw7 promotes Mcl-1 ubiquitination.**

- a**, Immunoblot (IB) analysis of whole cell lysates (WCL) and anti-Myc immunoprecipitates of 293T cells transfected with the indicated plasmids. Twenty hours post-transfection, cells were treated with the proteasome inhibitor MG132 overnight before harvesting.
- b**, The SCF<sup>Fbw7</sup> complex promotes Mcl-1 ubiquitination *in vitro*. Affinity-purified SCF<sup>Fbw7</sup> complexes were incubated with purified recombinant GST-Mcl-1 proteins, purified E1, E2 and ubiquitin as indicated at 30°C for 45 minutes. The ubiquitination reaction products were resolved by SDS-PAGE and probed with the anti-Mcl-1 antibody.
- c**, Inactivation of the individual putative ubiquitination sites in Mcl-1 does not impair Fbw7-mediated Mcl-1 destruction. Immunoblot analysis of 293T cells transfected with the indicated Myc-Mcl-1 and HA-Fbw7 plasmids in the presence or absence of HA-GSK3. A plasmid encoding GFP was used as a negative control for transfection efficiency.
- d**, Combinational inactivation of the putative ubiquitination sites in Mcl-1 leads to a progressive resistance to Fbw7-mediated Mcl-1 destruction. Immunoblot analysis of 293T cells transfected with the indicated Myc-Mcl-1 and HA-Fbw7 plasmids in the presence or absence of HA-GSK3. A plasmid encoding GFP was used as a negative control for transfection efficiency.
- e**, Inactivation of the five putative ubiquitination sites impairs the Fbw7-mediated ubiquitination of Mcl-1 *in vivo*. Immunoblot (IB) analysis of whole cell lysates (WCL) and anti-Myc immunoprecipitates of 293T cells transfected with the indicated plasmids. Twenty hours post-transfection, cells were treated with the proteasome inhibitor MG132 overnight before harvesting.
- f**, Immunoblot analysis of wild-type (WT) or *Fbw7*<sup>-/-</sup> DLD1 cells treated with 10 μM camptothecin (CPT) for the indicated durations of time.

**a**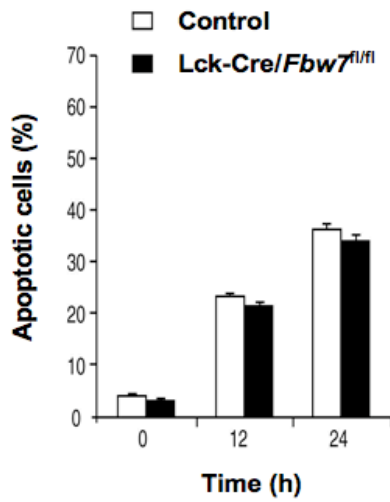**b**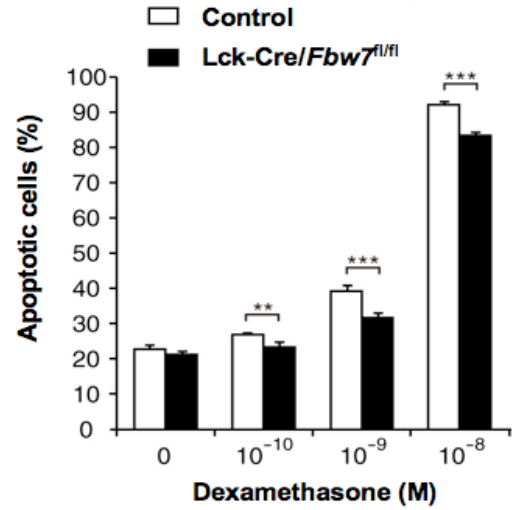**c**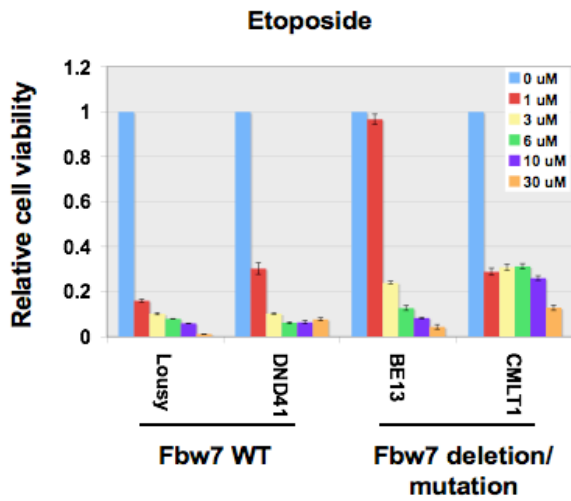**d**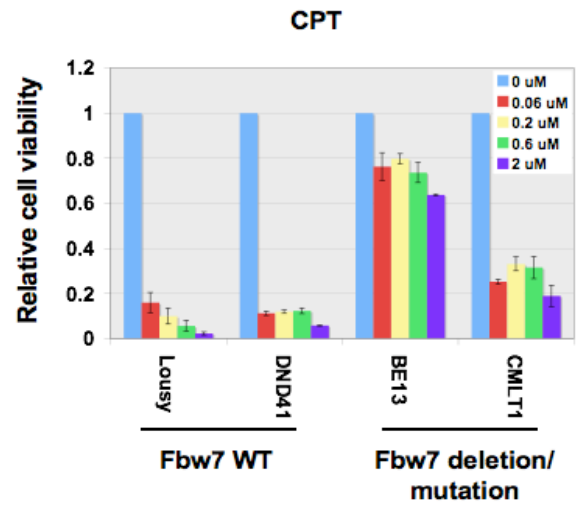**e**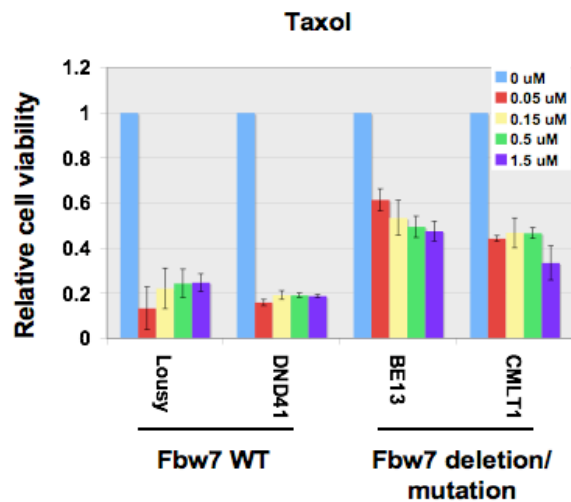**f**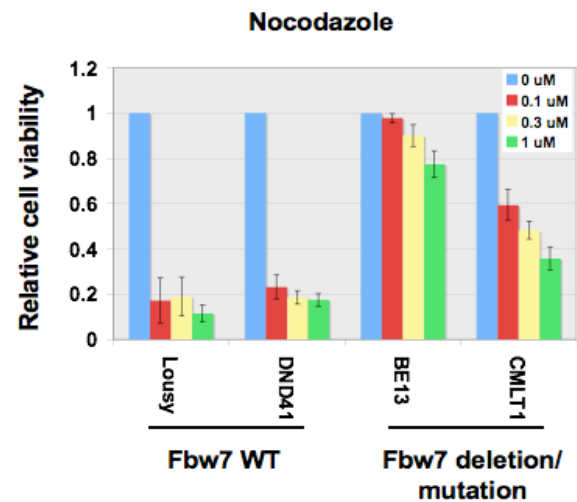



**g**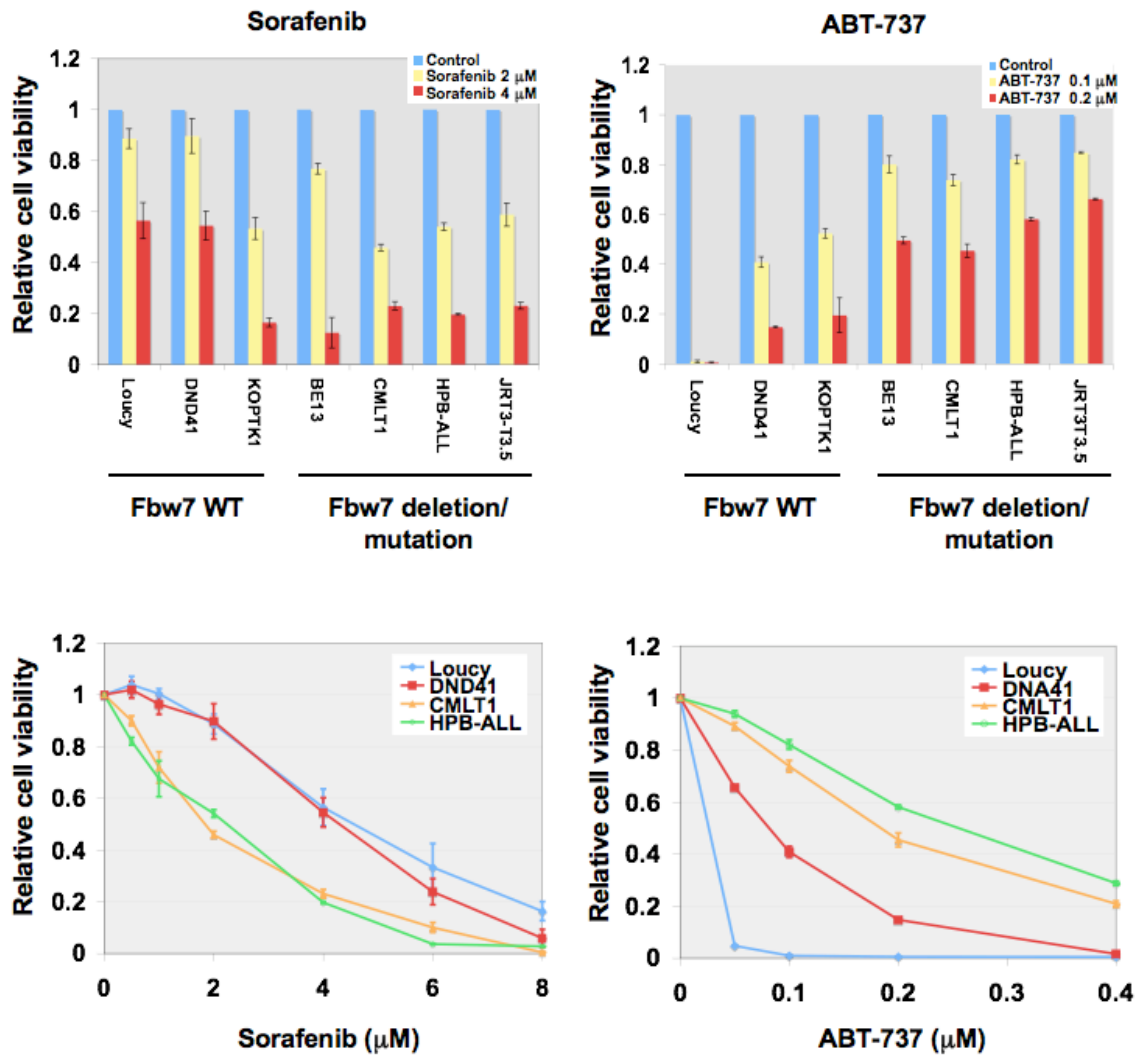**h**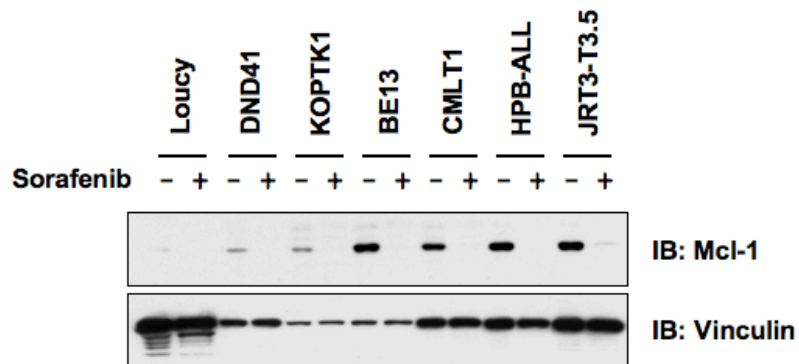

**i**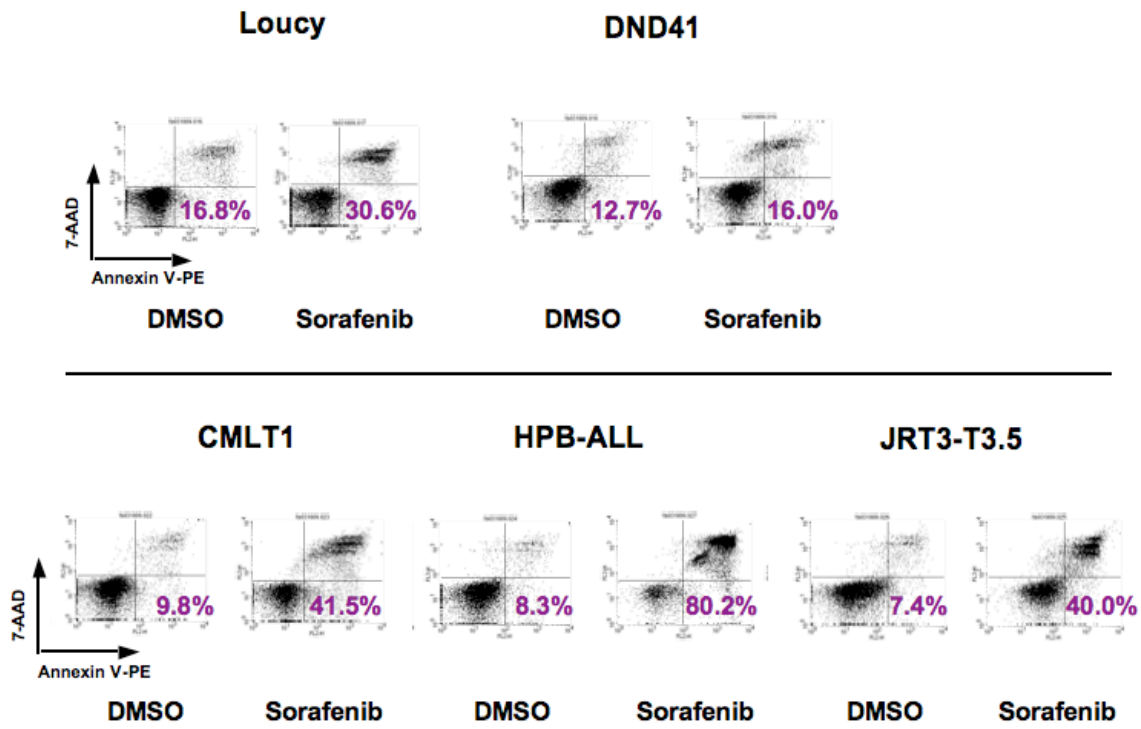

Fbw7 WT cell lines

Fbw7 mutated cell lines

**j**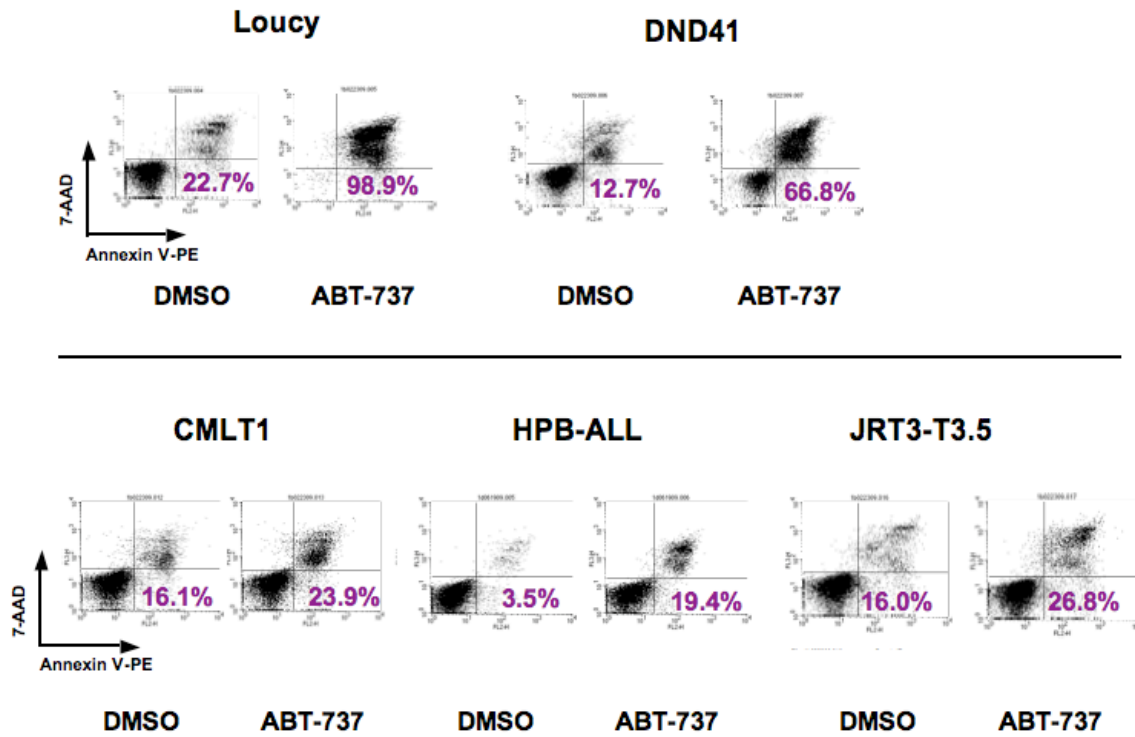

Fbw7 WT cell lines

Fbw7 mutated cell lines

**Supplementary Figure 9: Fbw7-deficient T-ALL cell lines are more sensitive to sorafenib, but have increased resistance to ABT-737 treatment.**

- a**, Thymocytes isolated from 8-wk-old Lck-Cre/*Fbw7*<sup>+/*fl*</sup> (Control) or Lck-Cre/*Fbw7*<sup>*fl/fl*</sup> (*Fbw7* KO) were cultured at 37°C for the indicated times and then stained with annexin V for determination of the proportion of apoptotic cells by flow cytometry. Data are represented as mean ± SD from three independent experiments.
- b**, Thymocytes of 8-wk-old Lck-Cre/*Fbw7*<sup>+/*fl*</sup> (Control) or Lck-Cre/*Fbw7*<sup>*fl/fl*</sup> (*Fbw7* KO) were cultured for 12 h at 37°C with the indicated concentrations of dexamethasone and then analyzed as in (a). \*\*, P < 0.01 using the Student *t* test. \*\*\*, P < 0.005 using the Student *t* test.
- c-f**, Cell viability assays showing that compared with T-ALL cell lines with wild-type *Fbw7*, *Fbw7*-deficient T-ALL cell lines were more resistant to multiple apoptotic stimuli including etoposide (c), camptothecin (CPT) (d), Taxol (e) and Nocodazole (f). Data was shown as mean ± SD for three independent experiments.
- g**, Cell viability assays showing that compared with T-ALL cell lines with wild-type *Fbw7*, *Fbw7*-deficient T-ALL cell lines were more sensitive to sorafenib, but resistant to ABT-737 treatment. T-ALL cells were cultured in 0.5% FBS-containing medium with the indicated concentrations of sorafenib or ABT-737 for 48 hours before performing the cell viability assays. Data was shown as mean ± SD for three independent experiments.
- h**, Immunoblot analysis of the indicated human T-ALL cell lines with or without sorafenib treatment in 0.5% FBS-containing medium.
- i**, 7-AAD/Annexin V double staining FACS analysis to detect the percentage of sorafenib-induced apoptosis of the indicated *Fbw7*-deficient T-ALL cell lines. Various T-ALL cells were cultured in 0.5% FBS-containing medium with or without sorafenib (2 μM) treatment for 48 hours before the FACS analysis. Numbers indicate the percentage of apoptotic cells.
- j**, 7-AAD/Annexin V double staining FACS analysis to detect the percentage of ABT-737-induced apoptosis of the indicated *Fbw7*-deficient T-ALL cell lines. Various T-ALL cells were cultured in 10% FBS-containing medium with or without ABT-737 (0.8 μM) treatment for 48 hours before the FACS analysis. Numbers indicate the percentage of apoptotic cells.

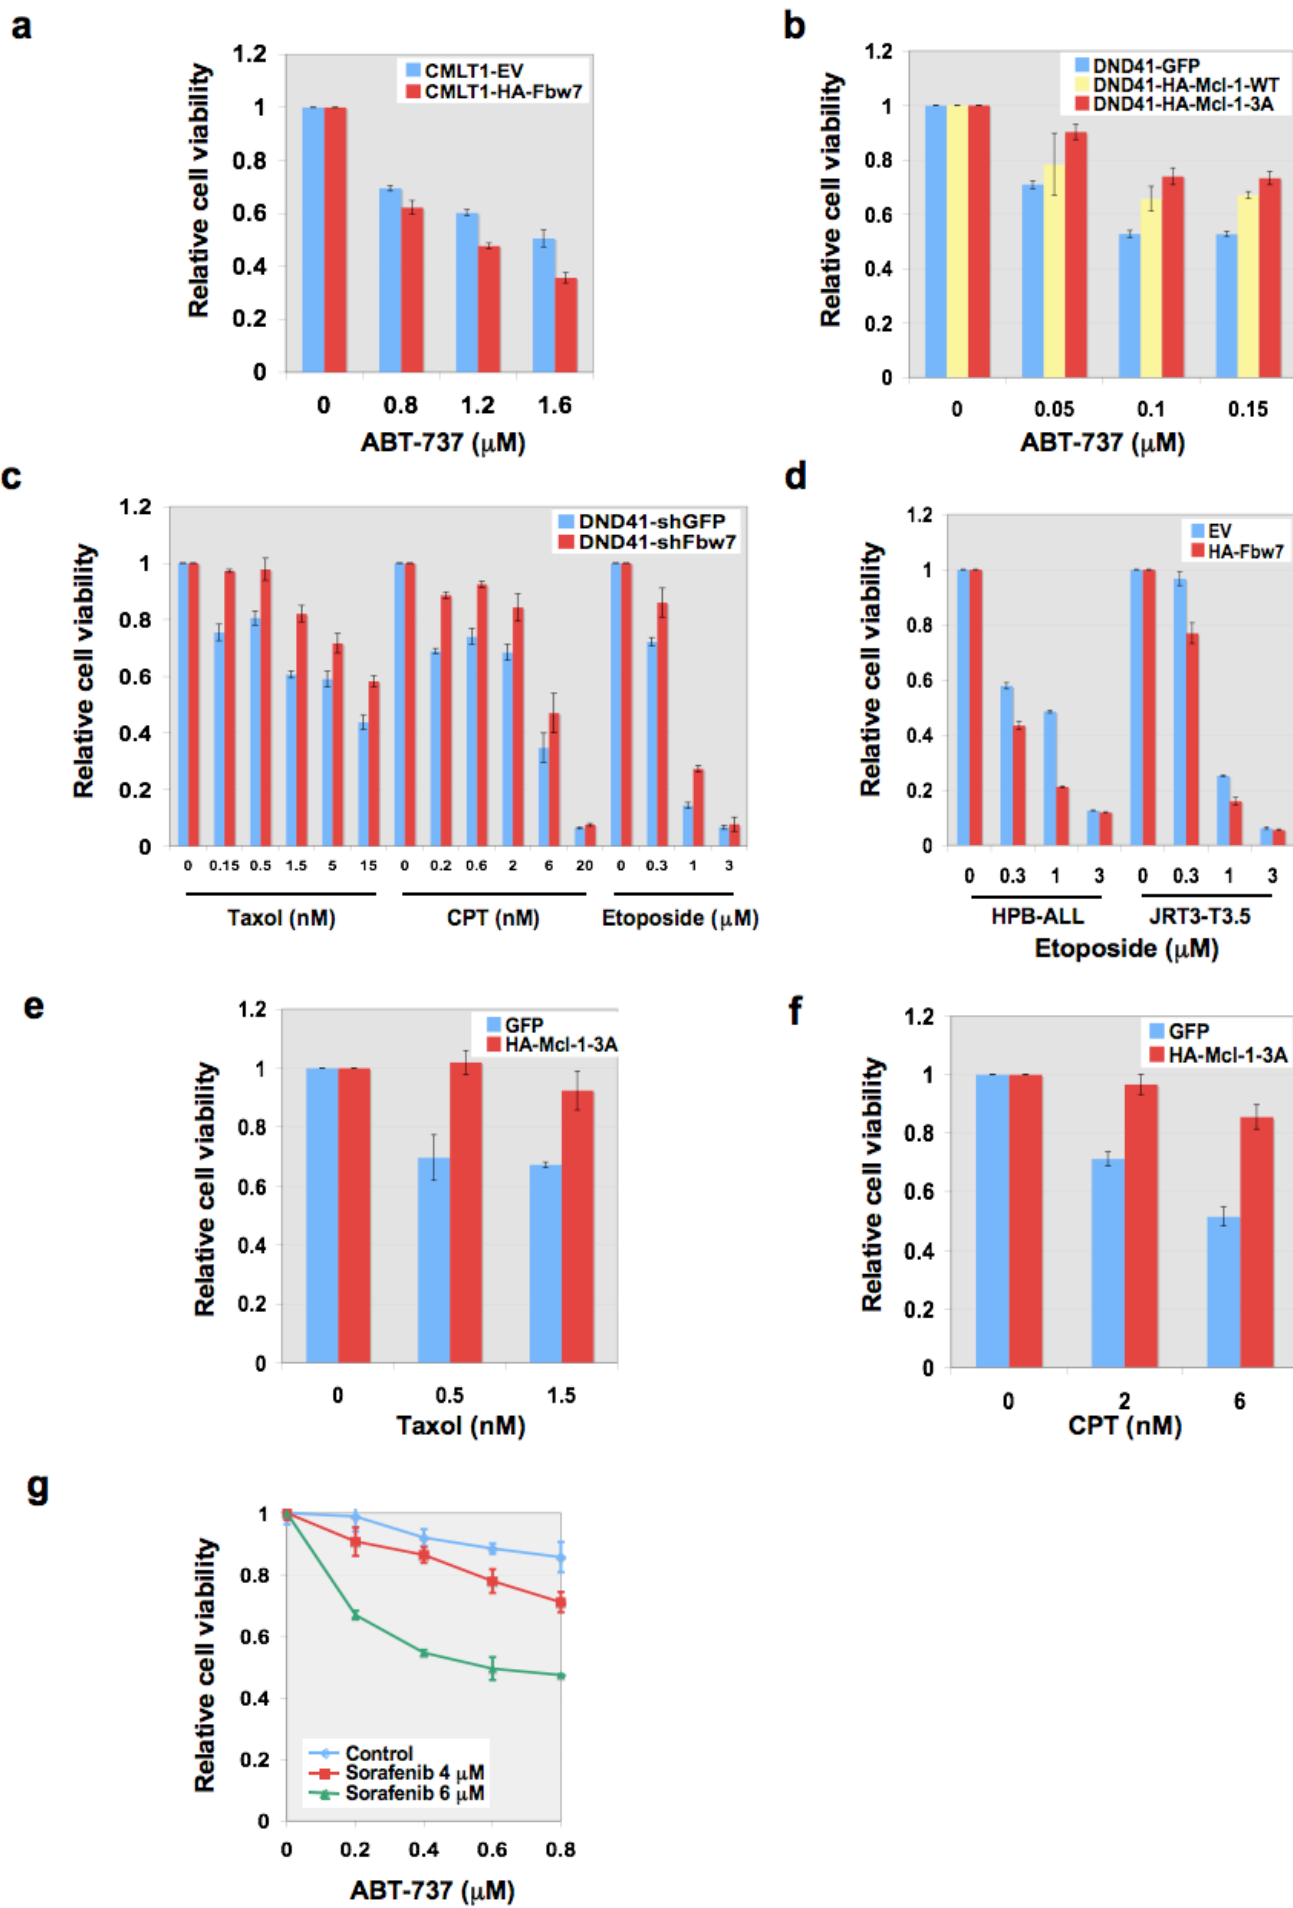

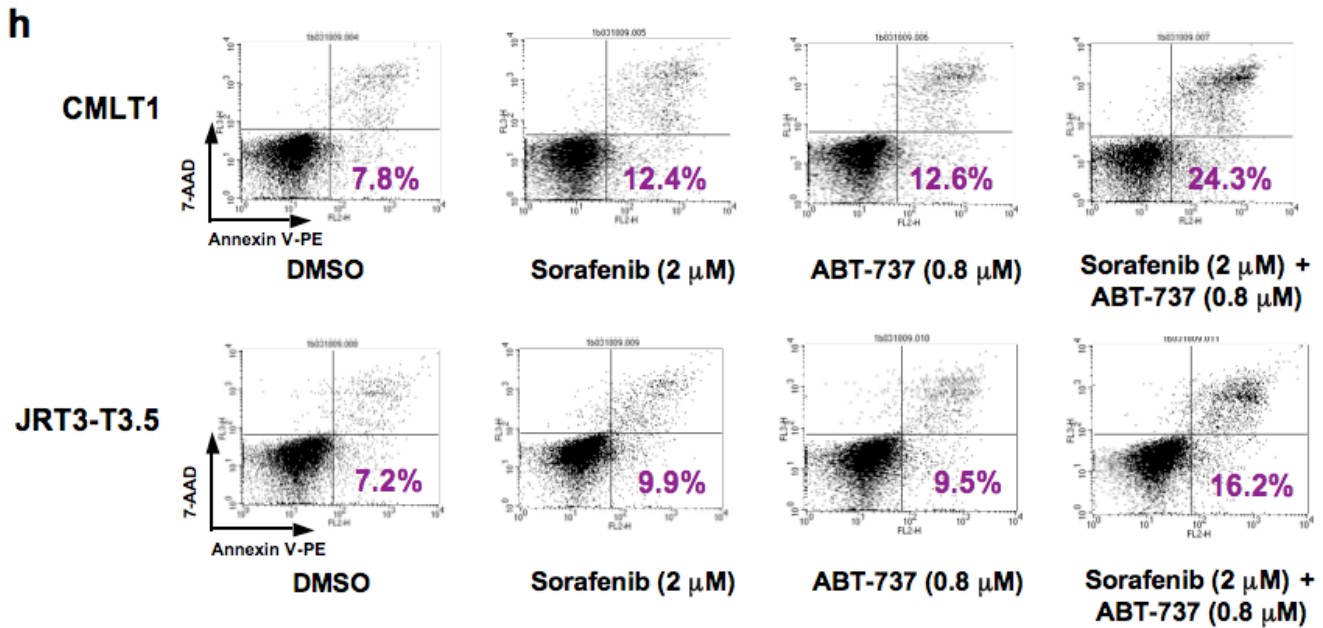

**Supplementary Figure 10: Manipulating Fbw7 activity changes ABT-737 sensitivity.**

- a**, Cell viability assays showing that re-introduction of wild-type Fbw7 into the Fbw7-deficient T-ALL (CMLT1) cell line partially restored its sensitivity to ABT-737 treatment. The CMLT1 cells were cultured in 10% FBS-containing medium with the indicated concentrations of ABT-737 treatment for 48 hours before performing the cell viability assays. Data was shown as mean  $\pm$  SD for three independent experiments.
- b**, Cell viability assays showing that re-introduction of wild-type or Mcl-1-3A into DND41 cells results in an increase in resistance to ABT-737 treatment. Indicated DND41 cells were cultured in 10% FBS-containing medium with the indicated concentrations of ABT-737 treatment for 48 hours before performing the cell viability assays. Data was shown as mean  $\pm$  SD for three independent experiments.
- c**, Cell viability assays showing that depletion of Fbw7 in DND41 cells resulted in elevated resistance to multiple apoptotic stimuli. Data was shown as mean  $\pm$  SD for three independent experiments.
- d**, Cell viability assays showing that re-introduction of wild-type Fbw7 into the Fbw7-deficient T-ALL cell lines (HPB-ALL and JRT3-T3.5) partially restored their sensitivity to etoposide-induced apoptosis. Data was shown as mean  $\pm$  SD for three independent experiments.
- e-f**, Cell viability assays showing that re-introduction of Mcl-1-3A into DND41 cells results in an increase in resistance to Taxol (**e**) and CPT (**f**) treatments. Data was shown as mean  $\pm$  SD for three independent experiments.
- g**, Cell viability assays to demonstrate that sorafenib treatment restored ABT-737 sensitivity in Fbw7-deficient HPB-ALL cells. HPB-ALL cells were cultured in 10% FBS-containing medium with the indicated concentrations of sorafenib and ABT-737 for 48 hours before performing the cell viability assays. In order to score the effects of increasing concentrations of ABT-737 on cell viability, each reading was scaled relative to the respective sorafenib treatment with 0  $\mu$ M ABT-737 set as 100%. Data was shown as mean  $\pm$  SD for three independent experiments.
- h**, 7-AAD/Annexin V double staining FACS analysis to demonstrate that sorafenib treatment restored ABT-737 sensitivity of Fbw7-deficient CMLT1 and JRT3-T3.5 cells. CMLT1 and JRT3-T3.5 cells were cultured in 10% FBS-containing medium with the indicated concentrations of sorafenib and/or ABT-737 for 48 hours before the FACS analysis. Numbers indicate the percentage of apoptotic cells.

**a**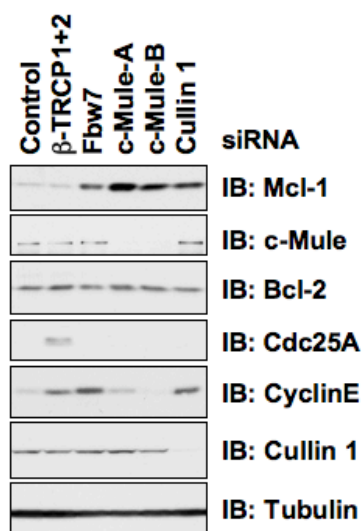**b**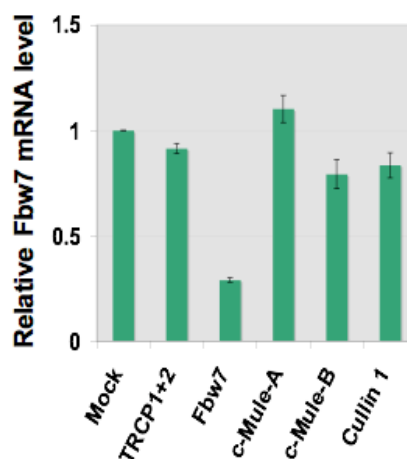**c**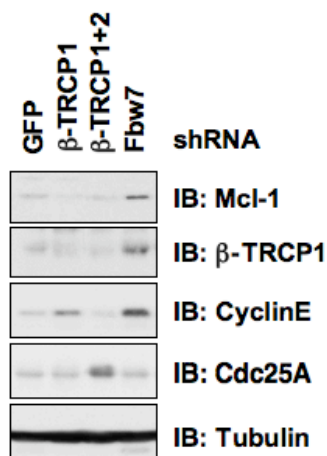**d**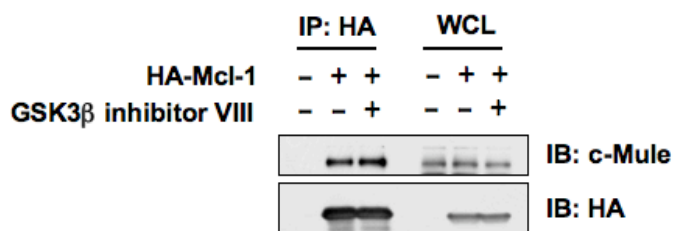**e**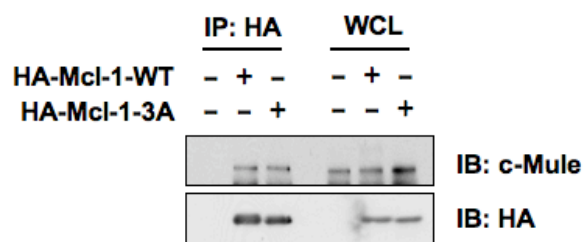**f**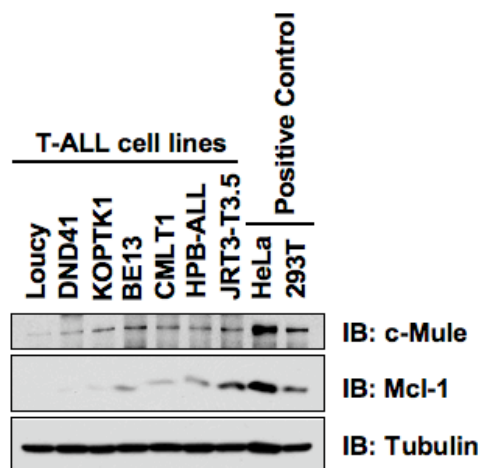**g**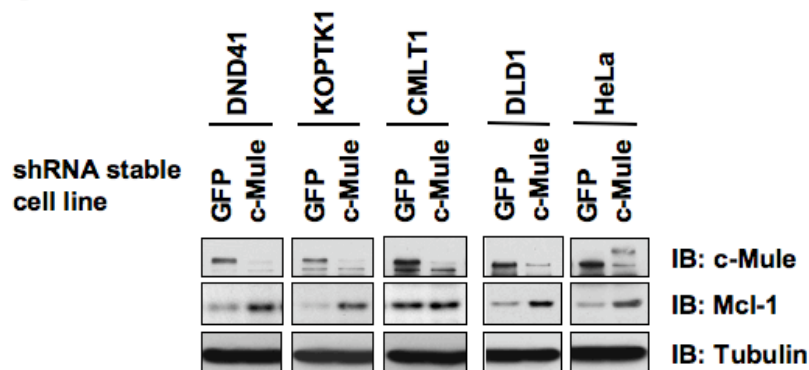

**Supplementary Figure 11: c-Mule is not the physiological E3 ubiquitin ligase for Mcl-1 in T-ALL cell lines.**

- a**, Immunoblot analysis of HeLa cells transfected with the indicated siRNA oligonucleotides.
- b**, Real-time RT-PCR analysis to examine the Fbw7 mRNA levels after treatments with the various siRNA oligos in **(a)**. Data was shown as mean  $\pm$  SD for three independent experiments.
- c**, Immunoblot analysis of HeLa cells transfected with the indicated shRNA constructs.
- d**, Immunoblot (IB) analysis of whole cell lysates (WCL) and immunoprecipitates (IP) derived from 293T cells transfected with HA-Mcl-1. Thirty hours post-transfection, cells were pretreated with 20  $\mu$ M MG132 for 8 hours to block the proteasome pathway before harvesting. Where indicated, 25  $\mu$ M GSK3 $\beta$  inhibitor VIII (with DMSO as a negative control) was added for 8 hours before harvesting.
- e**, Immunoblot (IB) analysis of whole cell lysates (WCL) and immunoprecipitates (IP) derived from 293T cells transfected with the indicated HA-Mcl-1 constructs. Thirty hours post-transfection, cells were pretreated with 10  $\mu$ M MG132 for 10 hours to block the proteasome pathway before harvesting.
- f**, Immunoblot analysis of the indicated human T-ALL cell lines cultured in 10 % FBS-containing medium. HeLa and 293T cell lines were included as positive controls for detection of the endogenous c-Mule expression.
- g**, Various cell lines were infected with the lentiviral sh-c-Mule construct (with shGFP as a negative control) and selected with 1  $\mu$ g/ml puromycin to eliminate the non-infected cells. Whole cell lysates were collected for immunoblot analysis with the indicated antibodies.
